# Supplementary material for: Beneficial shift of rhizosphere soil nutrients and metabolites under a sugarcane/peanut intercropping system
Source: Front Plant Sci. 2022 Dec 2;13:1018727. doi: 10.3389/fpls.2022.1018727 (PMC9757493; doi:10.3389/fpls.2022.1018727)
Supplement: Supplementary Table 2 — Differentially significant metabolites among different root treatments and different rhizosphere soil treatments. [file Table_2.xlsx]

## Sheet: MP-S vs. IP-S
Index	Formula	Compounds	Class	Score	CAS_ID	cpd_ID	VIP	p_value	Fold_Change	Log2FC	Type
P1135	C20H39NO2	Oleoylethanolamide;OEA	Alcohol and amines	0.6426	111-58-0	C20792	1.57778	0.0241735	4.09049	2.03227	up
P349	C27H46O4	3alpha,7alpha,12alpha-Trihydroxy-5beta-cholestan-26-al	Aldehydes,Ketones,Esters	0.6277	707119	C01301	1.65828	0.0225999	0.18781	-2.41265	down
P49	C6H13NO3	N-Hydroxy-L-isoleucine	Amino acids and their metabolites	0.6384	--	C20310	2.17866	6.94987e-06	0.566627	-0.81953	down
P445	C22H38N4O9	Leu Glu Ile Glu	Amino acids and their metabolites	0.6041	--	--	1.53178	0.0225015	0.61427	-0.703056	down
P459	C23H33N5O10	Asp Lys Tyr Asp	Amino acids and their metabolites	0.595	--	--	1.61082	0.0197627	0.622669	-0.683463	down
P875	C15H30N6O5	Val Thr Arg	Amino acids and their metabolites	0.714	362603-27-8	--	1.43091	0.0467708	1.82915	0.87117	up
P1041	C19H30N6O5	Thr Phe Arg	Amino acids and their metabolites	0.5898	--	--	1.61276	0.0229615	1.50665	0.591347	up
P452	C25H20ClN3O6	Phe4Cl-Trp-OH	Amino acids and their metabolites	0.5384	--	--	2.09989	0.000544515	14.2353	3.8314	up
N475	C12H14N4O3S	Sulfacytine	Benzene and substituted derivatives	0.6356	--	D02519	1.4068	0.0377607	1.51846	0.602606	up
N311	C5H12O5	Ribitol;Adonitol	Carbohydrates and their metabolites	0.6464	488-81-3	C00474	1.82226	0.00227176	0.591583	-0.757347	down
N54	C12H22O11	Sucrose	Carbohydrates and their metabolites	0.7845	57501	C00089	2.13191	6.92707e-05	1.61779	0.694022	up
P37	C18H32O16	Maltotriose	Carbohydrates and their metabolites	0.6565	--	C01835	2.00108	0.000317618	1.54204	0.624837	up
P462	C37H64N7O17P3S	Palmitelaidoyl-CoA	CoEnzyme and vitamins	0.8856	62358-02-5	--	2.0441	0.000374791	5.16823	2.36967	up
P338	C30H26O13	Tiliroside; LC-ESI-QTOF; MS2; CE	Flavonoids	0.5356	20316-62-5	C17140	1.8048	0.008118	0.444059	-1.17118	down
P1120	C23H46O4	MG(i-20:0/0:0/0:0)	Glycerolipids	0.6355	--	--	1.96285	0.000436343	0.418936	-1.2552	down
P355	C59H100O6	TG(18:2(9Z,12Z)/18:2(9Z,12Z)/20:3n6)	Glycerolipids	0.6027	--	--	1.97536	0.00335072	0.154592	-2.69346	down
P357	C59H104O6	TG(18:2(9Z,12Z)/18:1(9Z)/20:2n6)	Glycerolipids	0.5387	--	--	1.79316	0.00440134	0.507849	-0.977529	down
N56	C54H104O6	TG(i-21:0/i-18:0/12:0)	Glycerolipids	0.6366	--	--	1.90793	0.002704	1.82746	0.869843	up
P457	C69H134O17P2	CL(a-13:0/a-13:0/i-12:0/i-22:0)[rac]	Glycerolipids	0.619	--	--	1.86929	0.00260871	2.96964	1.57029	up
P484	C26H50O5	DG(8:0/0:0/a-15:0)	Glycerolipids	0.5854	--	--	1.67797	0.0136434	1.80548	0.852382	up
P460	C45H86O6	TG(i-22:0/8:0/12:0)	Glycerolipids	0.5754	--	--	2.01568	0.00111952	8.4545	3.07972	up
P429	C49H94O6	TG(a-21:0/i-15:0/10:0)[rac]	Glycerolipids	0.5544	--	--	2.0303	0.000284291	3.24152	1.69667	up
P350	C59H102O6	TG(18:2(9Z,12Z)/18:2(9Z,12Z)/20:2n6)	Glycerolipids	0.5015	--	--	1.75949	0.00942809	1.76073	0.816175	up
P438	C50H100NO8P	PE-NMe(20:0/24:0)	Glycerophospholipids	0.6556	--	--	1.80132	0.01162	0.114386	-3.12802	down
P521	C48H95O8P	PA(i-20:0/a-25:0)	Glycerophospholipids	0.6445	--	--	1.75174	0.00946499	0.337493	-1.56707	down
P444	C49H97O8P	PA(a-21:0/a-25:0)	Glycerophospholipids	0.5942	--	--	2.24225	1.3958e-05	0.26225	-1.93099	down
P439	C53H100NO8P	PE-NMe2(22:2(13Z,16Z)/24:1(15Z))	Glycerophospholipids	0.5561	--	--	1.96011	0.00345233	0.211619	-2.24046	down
P358	C52H104NO8P	1,2-Dibehenoyl-sn-glycero-3-phosphocholine	Glycerophospholipids	0.5077	37070487	--	1.76477	0.0126185	0.305111	-1.7126	down
P343	C27H29N5O6S	Bosentan	Heterocyclic compounds	0.5864	--	D07538	1.36098	0.0432239	0.341653	-1.5494	down
P463	C17H30N2O5	E-64d	Heterocyclic compounds	0.554	88321-09-9	--	2.06324	0.000312379	0.567426	-0.817497	down
P718	C13H15NO2	Securinine	Heterocyclic compounds	0.537	5610-40-2	C10614	1.39359	0.0456279	0.550927	-0.860066	down
P347	C53H82O2	Plastoquinol-9;Plastoquinol A	Heterocyclic compounds	0.7219	--	C16695	1.77975	0.00530517	1.89107	0.919206	up
P431	C19H18N8O7	N-Nitrosofolic acid	Heterocyclic compounds	0.6113	29291-35-8	C19480	1.91512	0.00156369	3.9496	1.98171	up
P490	C19H33N3O14P2	dTDP-4-dimethylamino-4,6-dideoxy-5-C-methyl-D-allose	Nucleotide and their metabolites	0.5103	--	C11447	1.93672	0.000769452	0.330053	-1.59923	down
N55	C10H15N5O11P2	Guanosine 5'-diphosphate	Nucleotide and their metabolites	0.6416	146-91-8	C00035	2.02819	0.000702183	1.50436	0.589148	up
P126	C6H6O7	Oxalosuccinic acid	Organic acid and their derivatives	0.8681	--	C05379	1.93451	0.00345363	0.635242	-0.654621	down
P105	C2H2O4	Oxalic acid	Organic acid and their derivatives	0.6378	144627	C00209	1.85969	0.00235511	0.539953	-0.889095	down
P27	C5H10O2S	S,S-Dimethyl-beta-propiothetin;S-Dimethylsulfonium propionic acid;Dimethylpropiothetin;DMPT;DMSP	Organic acid and their derivatives	0.622	7314-30-9	C04022	1.73467	0.0125884	0.198603	-2.33204	down
P435	C32H43NO4	Oleana-1,9(11)-dien-28-oic acid, 2-cyano-3,12-dioxo-, methyl ester	Organic acid and their derivatives	0.5874	218600534	D09585	1.8762	0.00306189	0.571504	-0.807164	down
P56	C6H10O5	2-Dehydro-3-deoxy-L-rhamnonate	Organic acid and their derivatives	0.9315	--	C03979	1.94744	0.00104036	1.64716	0.719982	up
P458	C45H52CoN4O16	Cobalt-precorrin 5A	Organic acid and their derivatives	0.6111	--	C16242	1.95573	0.00384657	1.63429	0.708665	up
P21	C5H8O5	2-Hydroxyglutaric acid	Organic acid and their derivatives	0.5225	--	C02630	1.52725	0.0261199	1.56003	0.641574	up
P514	C59H90O8	Thermozeaxanthin-13	Others	0.6617	--	C15956	1.6169	0.0225083	1.93683	0.953699	up
P754	C15H22	alpha-Curcumene;l-alpha-Curcumene;(-)-alpha-Curcumene;(R)-1-(1,5-Dimethyl-4-hexenyl)-4-methylbenzene	Others	0.6338	4176-17-4	C09649	2.16467	0.000101421	16.6939	4.06125	up
P87	C2H4Cl2O	Bis(chloromethyl) ether;BCME	Others	0.6331	542-88-1	C19158	1.50778	0.0410735	1.71942	0.781923	up
P470	C20H22N4O10S	Cefuroxime axetil;Cefuroxime 1-acetoxyethyl ester	Others	0.5838	64544-07-6	C08107	1.40038	0.0456752	2.30045	1.20191	up
P13	C5H14NO	Choline;Bilineurine	Tryptamines,Cholines,Pigments	0.6314	62-49-7	C00114	1.40246	0.0473341	1.51252	0.596958	up

## Sheet: MS-S vs. IS-S
Index	Formula	Compounds	Class	Score	CAS_ID	cpd_ID	VIP	p_value	Fold_Change	Log2FC	Type
P888	C15H26O	Cedrol	Alcohol and amines	0.7077	77532	C09631	1.72272	0.00687692	0.60517	-0.724588	down
P1031	C8H19NO	Heptaminol	Alcohol and amines	0.6379	372-66-7	D07158	2.30626	2.57747e-06	0.0015991	-9.28853	down
P886	C8H18N4O	Propanoylagmatine;Propionylagmatine	Alcohol and amines	0.637	--	C02581	2.04078	0.00179671	0.567581	-0.817101	down
P1061	C15H22O2	Curcumenol	Alcohol and amines	0.6253	--	C16942	1.98347	0.00185077	0.444773	-1.16886	down
P58	C4H4O	3-Butyn-1-al	Aldehydes,Ketones,Esters	0.6638	--	C06145	1.62748	0.0175283	1.85006	0.887575	up
P813	C19H20N2O	16-Epivellosimine	Alkaloids	0.6447	--	C11633	1.65099	0.0190274	0.260666	-1.93973	down
P875	C15H30N6O5	Val Thr Arg	Amino acids and their metabolites	0.714	362603-27-8	--	1.51319	0.0442403	1.85081	0.888159	up
P3	C3H7NO4S	L-Cysteine Sulfinic acid; LC-ESI-ITFT; MS2; m/z	Amino acids and their metabolites	0.7373	--	C00606	2.01436	0.000306393	0.665738	-0.586975	down
P861	C14H28N6O5	Ser Val Arg	Amino acids and their metabolites	0.725	--	--	1.62204	0.0266859	0.0846753	-3.56192	down
P750	C8H10O2	3-Methoxybenzyl alcohol;3-Anise alcohol;3-Anisyl alcohol	Benzene and substituted derivatives	0.6379	6971-51-3	C03352	1.55258	0.0354407	1.60441	0.682043	up
N98	C14H9Cl2NO5	Bifenox	Benzene and substituted derivatives	0.5757	42576023	C11066	2.09493	9.11581e-05	1.70969	0.773734	up
P50	C10H12N2O4S	N1,N4-Diacetylsulfanilamide	Benzene and substituted derivatives	0.5617	5626-90-4	--	2.01338	0.000514459	2.18314	1.12641	up
P848	C19H23N3O	CAY10441	Benzene and substituted derivatives	0.6374	221529-58-4	--	1.42029	0.036552	0.660636	-0.598073	down
N31	C18H32O16	D-(+)-Raffinose; LC-ESI-QTOF; MS2; CE	Carbohydrates and their metabolites	0.977	--	C00492	2.298	1.18089e-07	1.5842	0.663755	up
N32	C24H42O21	Stachyose	Carbohydrates and their metabolites	0.9252	470553	C01613	2.15173	3.29937e-05	1.80161	0.849285	up
P37	C18H32O16	Maltotriose	Carbohydrates and their metabolites	0.6565	--	C01835	1.79879	0.00650325	2.02652	1.019	up
N30	C24H42O21	Maltotetraose	Carbohydrates and their metabolites	0.6041	34612-38-9	C02052	2.235	5.35159e-05	1.69475	0.761076	up
N13	C4H8O4	Erythrose	Carbohydrates and their metabolites	0.6948	583-50-6	--	1.90466	0.00331641	0.654446	-0.611653	down
P344	C18H35NO	Octadecyl monoenamide	Fatty acyls	0.7936	--	--	2.14919	4.50799e-05	1.87926	0.910165	up
P268	C22H38O2	Docosatrienoic acid	Fatty acyls	0.5936	28845-86-5	C16534	1.47838	0.0461548	3.78857	1.92165	up
P1134	C16H32O2	14-Methylpentadecanoic acid	Fatty acyls	0.5892	4669027	--	1.69317	0.00811272	2.24537	1.16695	up
P1077	C16H16D14O2	Palmitoleic Acid-d14	Fatty acyls	0.8612	--	--	2.29676	6.10169e-06	0.0112872	-6.46916	down
P938	C20H34O2	5(Z),8(Z),11(Z)-Eicosatrienoic Acid	Fatty acyls	0.629	20590-32-3	C21938	1.5159	0.040416	0.539327	-0.890767	down
N56	C54H104O6	TG(i-21:0/i-18:0/12:0)	Glycerolipids	0.6366	--	--	1.47093	0.0260975	1.58231	0.66203	up
P36	C52H100O6	TG(i-19:0/22:0/8:0)	Glycerolipids	0.6044	--	--	2.01604	0.00064054	1.84322	0.882229	up
P484	C26H50O5	DG(8:0/0:0/a-15:0)	Glycerolipids	0.5854	--	--	1.90185	0.00266577	2.0864	1.06102	up
P457	C69H134O17P2	CL(a-13:0/a-13:0/i-12:0/i-22:0)[rac]	Glycerolipids	0.619	--	--	1.73756	0.00598728	0.251227	-1.99294	down
P355	C59H100O6	TG(18:2(9Z,12Z)/18:2(9Z,12Z)/20:3n6)	Glycerolipids	0.6027	--	--	2.13894	4.35518e-05	0.272134	-1.87761	down
P429	C49H94O6	TG(a-21:0/i-15:0/10:0)[rac]	Glycerolipids	0.5544	--	--	1.60629	0.0146407	0.277957	-1.84707	down
P438	C50H100NO8P	PE-NMe(20:0/24:0)	Glycerophospholipids	0.6556	--	--	1.87697	0.0047749	0.370799	-1.43129	down
P444	C49H97O8P	PA(a-21:0/a-25:0)	Glycerophospholipids	0.5942	--	--	1.40437	0.0379991	0.632425	-0.661033	down
P439	C53H100NO8P	PE-NMe2(22:2(13Z,16Z)/24:1(15Z))	Glycerophospholipids	0.5561	--	--	1.65409	0.00973238	0.491851	-1.02371	down
N112	C8H12N2O5	8-Hydroxyalanylclavam	Heterocyclic compounds	0.5856	--	C17359	2.18116	7.08673e-06	1.51827	0.602432	up
N29	C47H55ClF3N5O6S3	Navitoclax	Heterocyclic compounds	0.5701	923564516	D09935	2.24496	5.18541e-07	1.73305	0.793311	up
N116	C15H9NO3	7-Methylpyrido[3,4-c]psoralen	Heterocyclic compounds	0.5458	85878-63-3	C19458	2.18416	5.38388e-06	1.98713	0.990687	up
P818	C16H17NO3	Norcoclaurine	Heterocyclic compounds	0.9968	--	C06160	1.73551	0.0102185	0.472179	-1.08259	down
P986	C19H39NO	Tridemorph;2,6-Dimethyl-4-tridecylmorpholine	Heterocyclic compounds	0.8944	24602-86-6	C11285	2.2892	2.05871e-08	0.0897475	-3.47798	down
P762	C20H24O2	Exemestane	Heterocyclic compounds	0.7179	107868-30-4	C08162	1.50836	0.0257607	0.239648	-2.06101	down
P889	C10H18O2	()-trans-Linalyl oxide	Heterocyclic compounds	0.6186	--	--	1.65679	0.00855754	0.632431	-0.661019	down
P431	C19H18N8O7	N-Nitrosofolic acid	Heterocyclic compounds	0.6113	29291-35-8	C19480	1.46515	0.0315692	0.355091	-1.49374	down
P167	C10H13N5O4	Adenosine	Nucleotides and their metabolites	0.7749	58-61-7	C00212	2.12958	0.000108044	1.61583	0.692271	up
P73	C5H5N5	Adenine	Nucleotides and their metabolites	0.6608	73-24-5	C00147	1.50597	0.0356167	1.55346	0.635482	up
P63	C4H5N3O	Cytosine	Nucleotides and their metabolites	0.6482	71307	C00380	2.22978	1.69871e-05	2.01459	1.01048	up
P56	C6H10O5	2-Dehydro-3-deoxy-L-rhamnonate	Organic acids and their derivatives	0.9315	--	C03979	1.78572	0.00571168	1.60453	0.682153	up
P105	C2H2O4	Oxalic acid	Organic acids and their derivatives	0.6378	144627	C00209	1.73009	0.0148799	1.55619	0.638023	up
N58	C5H6O3	2-Hydroxy-2,4-pentadienoate;cis-2-Hydroxypenta-2,4-dienoate;Oxopent-4-enoate;2-Oxopent-4-enoate;2-Hydroxypenta-2,4-dienoate	Organic acids and their derivatives	0.6251	159694-16-3	C00596	2.0353	0.000394069	1.77305	0.826235	up
N68	C14H26NO14P	1-O-(2-Acetamido-2-deoxy-alpha-D-glucopyranosyl)-1D-myo-inositol 3-phosphate	Organic acids and their derivatives	0.5836	--	C19761	2.19463	4.22083e-06	1.64319	0.7165	up
P153	C3H5O6P	Phosphoenolpyruvic acid	Organic acids and their derivatives	0.8466	138-08-9	C00074	1.4967	0.0440766	0.552619	-0.855644	down
P514	C59H90O8	Thermozeaxanthin-13	Others	0.6617	--	C15956	1.67349	0.0178459	2.67681	1.42051	up
P1015	C17H36	Heptadecane	Others	0.8947	--	C01816	2.30836	2.84777e-08	0.0199013	-5.65099	down
P96	C4H7Cl	1-Chloro-2-methylpropene;1-Chloro-2-methyl-1-propene	Others	0.6183	513-37-1	C19206	1.47231	0.0244605	0.589136	-0.763328	down

## Sheet: MP-R vs. IP-R
Index	Formula	Compounds	Class	CAS_ID	cpd_ID	VIP	p_value	Fold_Change	Log2FC	Type
HJKP000649	C8H9NO	N-benzylformamide	Alkaloids	6343-54-0	C15561	1.16303	0.000232848	1.54869	0.631048	up
Lmgp000796	C8H7NO2	4-Hydroxymandelonitrile	Alkaloids	13093-65-7	C00650	1.16317	0.000268639	1.53016	0.613682	up
pmb0037	C10H15NO	Hordenine	Alkaloids	539-15-1	C06199	1.14268	0.00841333	1.60928	0.686413	up
pmb0490	C13H18N2O2	p-Coumaroylputrescine	Alkaloids	34136-53-3	C18326	1.12488	0.03057	1.52111	0.605123	up
Lmlp003161	C14H20N2O3	N-Feruloylputrescine	Alkaloids	501-13-3	C10497	1.17037	0.00445548	2.74241	1.45544	up
Lmhp003013	C15H22N2O3	N-Feruloyl-Cadaverine	Alkaloids	-	--	1.17452	0.00204741	3.53357	1.82113	up
pme2024	C10H12N2O	Serotonin*	Alkaloids	50-67-9	C00780	1.17787	0.0366617	0.000160601	-12.6042	down
Lmhp002153	C13H18N2O3	N-p-Coumaroylhydroxyputrescine	Alkaloids	-	--	1.1718	0.000371017	0.647408	-0.627253	down
Hmlp002408	C14H17NO8	HBOA-2-O-glucoside	Alkaloids	27625-86-1	--	1.17769	0.0489675	0.000120948	-13.0133	down
pmb0770	C20H20N2O4	N-Feruloylserotonin	Alkaloids	68573-23-9	--	1.17823	0.0267164	0.000103481	-13.2383	down
Lmtp000829	C24H26N2O13	Gomphrenin I (betanidin 6-O-β-glucoside)	Alkaloids	17008-59-2	C08544	1.17905	0.00455948	0.00012987	-12.9106	down
pme3017	C4H9NO2	2-Aminoisobutyric acid	Amino acids and derivatives	62-57-7	C03665	1.17193	8.84421e-05	1.50941	0.593983	up
mws0216	C5H9NO3	Trans-4-Hydroxy-L-proline	Amino acids and derivatives	51-35-4	C01157	1.17361	3.30251e-05	1.6075	0.684822	up
mws0258	C6H13NO2	L-Isoleucine*	Amino acids and derivatives	73-32-5	C00407	1.13467	0.00155569	1.70412	0.769029	up
mws0219	C4H7NO4	L-Aspartic acid	Amino acids and derivatives	56-84-8	C00049	1.16328	0.00989342	1.68923	0.756367	up
pme0057	C4H9NO2S	L-Homocysteine	Amino acids and derivatives	6027-13-0	C00155	1.16877	7.34874e-05	1.96245	0.972653	up
pme0193	C5H10N2O3	L-Glutamine	Amino acids and derivatives	56-85-9	C00064	1.17752	2.68775e-06	1.61967	0.695702	up
pme0026	C6H14N2O2	L-Lysine	Amino acids and derivatives	56-87-1	C00047	1.17259	0.00412198	1.67829	0.746989	up
mws1050	C5H9NO4	O-Acetylserine	Amino acids and derivatives	5147-00-2	C00979	1.17034	6.09963e-05	1.8694	0.902573	up
pme1210	C5H11NO2S	L-Methionine	Amino acids and derivatives	63-68-3	C00073	1.17509	0.000364781	1.60495	0.682529	up
mws1550	C6H11NO2S	S-Allyl-L-cysteine	Amino acids and derivatives	21593-77-1	C16759	1.16536	0.0159236	4.02047	2.00736	up
pme0253	C8H15NO3	N-Acetyl-L-leucine	Amino acids and derivatives	1188-21-2	C02710	1.17474	0.00220652	2.67601	1.42008	up
mws0250	C9H11NO3	L-Tyrosine	Amino acids and derivatives	60-18-4	C00082	1.16913	0.00277972	1.68454	0.752354	up
pme0122	C8H16N2O3	N6-Acetyl-L-lysine	Amino acids and derivatives	692-04-6	C02727	1.17384	0.00181792	2.30567	1.20519	up
mws5041	C8H16N2O3	L-Glycyl-L-isoleucine*	Amino acids and derivatives	19461-38-2	--	1.15211	0.000767735	1.62729	0.702476	up
mws0736	C8H16N2O3	N-Glycyl-L-leucine*	Amino acids and derivatives	869-19-2	C02155	1.16649	0.000287927	1.5683	0.649204	up
pme0075	C7H11NO5	N-Acetyl-L-glutamic acid	Amino acids and derivatives	1188-37-0	C00624	1.17138	0.00173799	1.66614	0.736509	up
mws0193	C7H15N3O3	L-Homocitrulline	Amino acids and derivatives	1190-49-4	C02427	1.17394	1.55376e-05	2.09844	1.06931	up
pme0170	C8H16N4O3	N-Acetyl-L-Arginine	Amino acids and derivatives	155-84-0	--	1.17293	0.00103654	2.17932	1.12388	up
Lmrj001698	C9H18N2O4	L-Seryl-L-Isoleucine	Amino acids and derivatives	91086-51-0	--	1.17215	1.24656e-05	4.05447	2.01951	up
mws5042	C11H14N2O3	L-Glycyl-L-phenylalanine	Amino acids and derivatives	721-66-4	--	1.08798	0.0190103	1.84412	0.88293	up
Lmhp001461	C11H20N2O3	L-Prolyl-L-Leucine	Amino acids and derivatives	52899-07-7	--	1.10523	0.0229353	1.55694	0.638716	up
Lmhp001670	C11H22N2O3	L-Valyl-L-Leucine	Amino acids and derivatives	3989-97-7	--	1.17499	1.04868e-05	2.2241	1.15322	up
mws4176	C12H16N2O3	L-Alanyl-L-Phenylalanine	Amino acids and derivatives	3061-90-3	--	1.15233	0.00836914	2.17543	1.1213	up
Lmhp003064	C14H16N2O2	Cyclo(Pro-Phe)	Amino acids and derivatives	3705-26-8	C11847	1.04252	0.0124779	2.0758	1.05367	up
Lmhp002031	C12H24N2O3	L-Leucyl-L-Leucine	Amino acids and derivatives	3303-31-9	--	1.17898	0.00010172	4.51925	2.17608	up
Lmhp002001	C14H20N2O3	L-Valyl-L-Phenylalanine	Amino acids and derivatives	3918-92-1	--	1.17676	7.02251e-05	2.193	1.13291	up
Zmgn001039	C9H17NO6S	S-Ribosyl-L-homocysteine	Amino acids and derivatives	-	C03539	1.17184	0.00746143	2.79349	1.48207	up
pme2890	C8H16N2O4S2	L-Homocystine	Amino acids and derivatives	626-72-2	C01817	1.15783	0.0134719	2.58317	1.36914	up
mws5035	C15H22N2O3	L-Leucyl-L-phenylalanine	Amino acids and derivatives	56217-82-4	--	1.17887	0.000160575	3.92055	1.97106	up
mws1375	C12H21N3O6	Nicotianamine	Amino acids and derivatives	34441-14-0	C05324	1.13086	0.00524725	1.61735	0.693632	up
mws0636	C18H20N2O3	L-Phenylalanyl-L-phenylalanine	Amino acids and derivatives	2577-40-4	--	1.17399	9.6926e-06	3.46311	1.79207	up
mws0582	C11H19N3O6S	S-(Methyl)glutathione	Amino acids and derivatives	2922-56-7	C11347	1.17456	0.00220839	2.02237	1.01605	up
pme2735	C15H22N6O5S	S-Adenosyl-L-methionine	Amino acids and derivatives	29908-03-0	C00019	1.0346	0.0185884	1.61005	0.687104	up
mws4134	C20H32N6O12S2	Oxiglutatione	Amino acids and derivatives	27025-41-8	C00127	1.15784	0.00753978	4.65924	2.2201	up
pme2527	C5H12N2O2	L-Ornithine	Amino acids and derivatives	70-26-8	C00077	1.15138	0.00696958	0.662344	-0.594347	down
mws0340	C6H8O4	2,3-Dimethylsuccinic acid	Amino acids and derivatives	13545-04-5	--	1.11179	0.0402284	0.564517	-0.824912	down
pme2914	C6H10O5	3-Hydroxy-3-methylpentane-1,5-dioic acid	Amino acids and derivatives	503-49-1	C03761	1.17475	1.17175e-05	0.51036	-0.970414	down
Lmbp000123	C6H13NO2S	L-Homomethionine	Amino acids and derivatives	25148-30-5	C17213	1.17897	0.00572891	0.000200089	-12.2871	down
pmb0962	C10H22N2O4	L-Lysine-Butanoic acid	Amino acids and derivatives	80407-71-2	--	1.16056	0.0143829	0.468557	-1.0937	down
pme0355	C15H10O4	Daidzein	Flavonoids	486-66-8	C10208	1.17543	0.000231058	2.80065	1.48576	up
Lmgp004720	C16H13O4+	7-Methoxyapigenindin	Flavonoids	-	--	1.15298	0.00127662	1.58504	0.664523	up
pmp000344	C15H10O5	3',4',7-Trihydroxyflavone	Flavonoids	2150-11-0	--	1.16668	0.000744031	1.8912	0.9193	up
pme3261	C15H10O5	6-Hydroxydaidzein	Flavonoids	17817-31-1	C14314	1.17375	4.89301e-05	3.38498	1.75915	up
mws0063	C15H10O5	Genistein	Flavonoids	446-72-0	C06563	1.15322	0.00310189	1.99821	0.998711	up
pmp000571	C15H10O5	Apigenin	Flavonoids	520-36-5	C01477	1.17442	0.00175634	1.94453	0.959419	up
Zmpn002440	C15H12O6	3,4,2',4',6'-Pentahydroxychalcone	Flavonoids	14917-41-0	C15525	1.17083	0.00385921	2.0798	1.05645	up
pmp000001	C16H12O6	Hispidulin (5,7,4'-Trihydroxy-6-methoxyflavone)	Flavonoids	1447-88-7	C10058	1.1631	0.00020545	1.73246	0.792825	up
Lmgp004731	C21H20O10	Genistein-7-O-galactoside	Flavonoids	-	--	1.05637	0.0182235	1.50621	0.590924	up
mws0048	C21H20O10	Apigenin-8-C-Glucoside (Vitexin)*	Flavonoids	3681-93-4	C01460	1.13998	0.0346031	2.51954	1.33316	up
Lmdp003286	C21H20O12	Isohyperoside	Flavonoids	35589-21-0	--	1.16816	0.00332597	1.59124	0.670148	up
mws0061	C21H20O12	Quercetin-3-O-galactoside (Hyperin)	Flavonoids	482-36-0	C10073	1.03062	0.0205033	1.52134	0.605345	up
pme1598	C22H24O11	Hesperetin-5-O-glucoside	Flavonoids	69651-80-5	--	1.1571	0.00933319	1.53364	0.61696	up
Hmln002189	C24H22O15	Quercetin-3-O-(6''-malonyl)galactoside	Flavonoids	-	--	1.16317	0.00666618	2.55937	1.35579	up
HJAP064	C25H24O15	Isorhamnetin-3-O-(6''-malonylglucoside)	Flavonoids	-	--	1.17498	8.39874e-06	2.3103	1.20808	up
Lmjp002596	C26H28O16	Quercetin-3-O-sambubioside	Flavonoids	83048-35-5	C12637	1.15748	0.0122349	1.59484	0.673411	up
mws0059	C27H30O16	Quercetin-3-O-rutinoside (Rutin)	Flavonoids	153-18-4	C05625	1.16864	0.00126062	1.63363	0.708085	up
Lmtp003677	C27H30O17	Quercetin-3-O-sophoroside (Baimaside)	Flavonoids	18609-17-1	C12667	1.1658	0.00941942	2.77644	1.47324	up
Hmgp002953	C29H32O17	Tricin-7-O-(2''-O-rhamnosyl)galacturonide	Flavonoids	89915-54-8	--	1.17889	0.00567002	1638	10.6777	up
mws1178	C16H16O4	Vestitol	Flavonoids	35878-41-2	C16225	1.17868	8.38382e-05	0.415772	-1.26614	down
mws0054	C15H14O6	Catechin	Flavonoids	154-23-4	C06562	1.16853	0.000743979	0.107061	-3.2235	down
Zmhp002714	C16H12O6	5,6,7-Tetrahydroxy-8-methoxyflavone	Flavonoids	-	--	1.15125	0.000939357	0.593899	-0.751711	down
Zmhp002814	C16H12O6	5,7,8-Tetrahydroxy-6-methoxyflavone	Flavonoids	-	--	1.17054	8.91597e-05	0.56197	-0.831435	down
mws1033	C16H14O6	Homoeriodictyol	Flavonoids	446-71-9	C09756	1.17555	3.60571e-05	0.558847	-0.839476	down
pmf0392	C17H16O6	Persicogenin (5,3'-dihydroxy-7,4'-dimethoxyflavanone)	Flavonoids	28590-40-1	--	1.17481	2.3305e-05	0.595948	-0.746741	down
Lmsp008264	C18H16O6	4'-Hydroxy-5,6,7-trimethoxyflavone	Flavonoids	6938-18-7	C14986	1.14939	0.000868517	0.601647	-0.733012	down
Lmgn003755	C17H14O7	5,7-Dihydroxy-2'-methoxy-3',4'-methyleneoxydihydroisoflavone	Flavonoids	-	--	1.17036	0.000139719	0.435742	-1.19845	down
Lmsp008443	C17H16O7	3,3',5-Trihydroxy-4',7-dimethoxyflavanone	Flavonoids	-	--	1.16933	9.62723e-05	0.559606	-0.837517	down
pmp000637	C20H20O5	Sophoraflavanone B	Flavonoids	53846-50-7	C18023	1.17811	0.000522255	0.337414	-1.56741	down
pmp000638	C20H18O6	8-Prenylkaempferol	Flavonoids	28610-31-3	--	1.17556	0.00149404	0.355201	-1.49329	down
pme1587	C21H20O9	Daidzein-7-O-glucoside(Daidzin)	Flavonoids	552-66-9	C10216	1.16945	0.00030125	0.634628	-0.656017	down
pme3504	C22H22O9	Formononetin-7-O-glycoside (Ononin)	Flavonoids	486-62-4	C10509	1.16508	0.00023478	0.506277	-0.982002	down
mws0895	C21H20O10	Genistein-7-O-Glucoside (Genistin)	Flavonoids	529-59-9	C09126	1.15715	0.00132468	0.383219	-1.38376	down
pmp000413	C21H20O10	Genistein-8-C-glucoside	Flavonoids	66026-80-0	C10420	1.17897	0.00572162	0.000185734	-12.3945	down
pme3400	C22H22O10	Biochanin A-7-O-glucoside (Sissotrin)*	Flavonoids	5928-26-7	C05376	1.17282	0.000944467	0.467296	-1.09759	down
pmp000573	C22H22O10	Acacetin-7-O-galactoside*	Flavonoids	-	--	1.17532	1.23081e-05	0.444636	-1.1693	down
pmp000575	C22H22O10	Acacetin-7-O-glucoside (Tilianin)*	Flavonoids	4291-60-5	--	1.16777	0.000172164	0.444144	-1.1709	down
mws2209	C21H20O11	Kaempferol-3-O-glucoside (Astragalin)	Flavonoids	480-10-4	C12249	1.16517	0.000182033	0.525474	-0.928308	down
Hmpp003270	C21H20O11	Luteolin-4'-O-glucoside	Flavonoids	6920-38-3	--	1.15619	0.00222964	0.527037	-0.924025	down
pmp000172	C23H24O11	5,2'-Dihydroxy-7,8-dimethoxyflavone glycosides	Flavonoids	-	--	1.17659	0.00024982	0.341499	-1.55005	down
pmp000193	C24H22O12	6''-O-Malonyldaidzin	Flavonoids	124590-31-4	C16191	1.16168	0.000687774	0.65601	-0.60821	down
Zmdp005767	C25H24O12	Formononetin-7-O-(6''-Malonyl)glucoside	Flavonoids	-	C16222	1.17618	0.00263576	0.425379	-1.23318	down
pmp000195	C25H24O13	6''-O-Malonylglycitin	Flavonoids	137705-39-6	C16197	1.17371	0.000257767	0.536259	-0.898998	down
Lmdp004892	C24H22O14	Kaempferol-3-O-(6''-malonyl)galactoside	Flavonoids	-	--	1.15129	0.00269392	0.627638	-0.671996	down
Zmhp006502	C25H24O14	Kaempferide-3-O-(6''-malonyl)glucoside	Flavonoids	-	--	1.16392	0.00762491	0.370707	-1.43165	down
mws1292	C26H28O14	Isoschaftoside	Flavonoids	52012-29-0	--	1.08202	0.0274056	0.276529	-1.8545	down
Lmtp002474	C26H28O14	Apigenin-6-C-(2''-glucosyl)arabinoside	Flavonoids	-	--	1.06027	0.0396809	0.332946	-1.58664	down
Lmnp002741	C27H30O14	Genkwanin-6-C-(2''-O-apiosyl)glucoside	Flavonoids	-	--	1.15597	0.00159442	0.57878	-0.788914	down
HJAP148	C26H28O15	Kaempferol-3-O-sambubioside	Flavonoids	27661-51-4	--	1.09458	0.00472245	0.530958	-0.913329	down
pmp001288	C28H32O14	Acacetin-7-O-rutinoside (Linarin)	Flavonoids	480-36-4	--	1.17052	0.000167965	0.512354	-0.964788	down
Lmwp005248	C42H46O22	Kaempferol-3-O-(6'''-p-Coumaroyl)glucosyl-(1→2)-Glucoside-7-O-Rhamnoside	Flavonoids	-	--	1.16212	0.00201099	0.663569	-0.591681	down
mws1405	C15H8O5	Coumestrol	Lignans and Coumarins	479-13-0	C10205	1.16287	0.000275303	1.61466	0.691233	up
Hmlp003129	C20H22O6	Matairesinol	Lignans and Coumarins	580-72-3	C10682	1.17788	0.000283599	0.276907	-1.85253	down
Lmgp003270	C16H16O10	Scopoletin-7-O-glucuronide	Lignans and Coumarins	132752-65-9	--	1.17828	0.0309298	0.000134626	-12.8588	down
pmn001375	C26H32O12	1-Hydroxypinoresinol-1-O-Glucoside	Lignans and Coumarins	81495-71-8	--	1.17845	0.0246847	2.91435e-05	-15.0665	down
pmb0885	C18H26O3	4-Oxo-9Z,11Z,13E,15E-Octadecatetraenoic acid	Lipids	-	--	1.17043	0.0013754	2.62897	1.3945	up
pmn001691	C18H32O5	9,12,13-Trihydroxy-10,15-octadecadienoic acid	Lipids	-	--	1.17309	0.00205987	2.01934	1.01388	up
pmb1562	C21H34O4	1-Stearidonoyl-Glycerol	Lipids	-	--	1.16327	0.00652999	1.86891	0.902197	up
pmb0296	C21H40O4	1-Oleoyl-Sn-Glycerol	Lipids	129784-87-8	--	1.17375	2.84171e-05	2.79642	1.48358	up
pmd0142	C28H58NO7P	LysoPC 20:0(2n isomer)	Lipids	-	--	1.17904	0.00303621	2437.63	11.2513	up
Lmqn008369	C27H49O12P	PI(18:2/0:0)	Lipids	-	--	1.08567	0.0154925	1.53162	0.615059	up
Lmhp008513	C33H56O14	2-α-Linolenoyl-glycerol-1,3-di-O-glucoside	Lipids	-	--	1.17225	0.00384882	2.59288	1.37456	up
Lmhp008744	C33H56O14	1-α-Linolenoyl-glycerol-2,3-di-O-glucoside	Lipids	-	--	1.17368	0.00427549	2.99025	1.58027	up
Lmhp009190	C33H58O14	2-Linoleoylglycerol-1,3-di-O-glucoside	Lipids	-	--	1.16825	0.00902262	4.06307	2.02257	up
Lmhp009384	C33H58O14	1-Linoleoylglycerol-2,3-di-O-glucoside	Lipids	-	--	1.17839	3.5882e-07	4.09583	2.03415	up
Zmgn003633	C12H20O3	12-Oxo-10E-Dodecenoic acid	Lipids	65410-38-0	C16309	1.16672	0.000112756	0.54926	-0.864438	down
mws0383	C17H32O2	10-Heptadecenoic acid	Lipids	29743-97-3	--	1.13716	0.00210069	0.573377	-0.802445	down
mws1355	C16H32O3	16-Hydroxyhexadecanoic acid	Lipids	506-13-8	C18218	1.17913	0.000793546	0.000524679	-10.8963	down
mws0397	C20H30O2	Cis-5,8,11,14,17-Eicosapentaenoic acid	Lipids	10417-94-4	C06428	1.17833	0.0220393	0.000341595	-11.5154	down
mws0369	C20H32O2	Arachidonic acid	Lipids	506-32-1	C00219	1.16364	0.00183235	0.550638	-0.860824	down
pmb2789	C18H30O4	13S-Hydroperoxy-6Z,9Z,11E-octadecatrienoic acid	Lipids	121107-97-9	--	1.17912	0.00249123	3.31203e-05	-14.8819	down
mws0932	C20H32O4	15-Hydroperoxyicosatetraenoic acid	Lipids	70981-96-3	C05966	1.14607	0.00334563	0.638012	-0.648345	down
Lmhp008337	C19H40NO7P	LysoPE 14:0(2n isomer)	Lipids	-	--	1.17601	0.00265454	0.310901	-1.68547	down
Lmhp008440	C20H40NO7P	LysoPE 15:1	Lipids	-	--	1.16768	0.00211393	0.451176	-1.14824	down
Lmhp008273	C20H40NO7P	LysoPE 15:1(2n isomer)	Lipids	-	--	1.16858	0.000133907	0.445075	-1.16788	down
Lmhp008885	C20H42NO7P	LysoPE 15:0(2n isomer)	Lipids	-	--	1.17532	3.27614e-05	0.511838	-0.96624	down
Lmhp007836	C21H38NO7P	LysoPE 16:3	Lipids	-	--	1.15888	0.00103782	0.287037	-1.80069	down
Lmhp009034	C21H42NO7P	LysoPE 16:1	Lipids	-	--	1.16637	0.00140681	0.43924	-1.18692	down
Lmhp008763	C21H42NO7P	LysoPE 16:1(2n isomer)	Lipids	-	--	1.15227	0.00321628	0.46926	-1.09154	down
pmd0160	C21H44NO7P	LysoPE 16:0(2n isomer)	Lipids	-	--	1.16291	0.00175174	0.468211	-1.09477	down
Lmhp009464	C22H44NO7P	LysoPE 17:1(2n isomer)	Lipids	-	--	1.14946	0.00335531	0.556344	-0.845952	down
Lmhp009769	C22H44NO7P	LysoPE 17:1	Lipids	-	--	1.15478	0.00409145	0.548971	-0.865197	down
Lmhp010162	C22H46NO7P	LysoPE 17:0	Lipids	-	--	1.17029	1.53686e-05	0.195056	-2.35804	down
Lmhp008233	C23H40NO7P	LysoPE 18:4	Lipids	-	--	1.15697	0.000159866	0.265281	-1.91441	down
Lmhp008801	C23H42NO7P	LysoPE 18:3	Lipids	-	--	1.17743	0.0003498	0.620582	-0.688306	down
Lmhp008589	C23H42NO7P	LysoPE 18:3(2n isomer)	Lipids	-	--	1.17276	0.00107896	0.635923	-0.653077	down
pmb0856	C23H46NO7P	LysoPE 18:1(2n isomer)	Lipids	-	--	1.17694	5.74144e-05	0.426831	-1.22826	down
mws0289	C23H46NO7P	LysoPE 18:1	Lipids	89576-29-4	--	1.17579	8.81589e-05	0.441478	-1.17959	down
pmb0880	C23H48NO7P	LysoPE 18:0(2n isomer)	Lipids	-	--	1.17169	3.84263e-05	0.444751	-1.16893	down
Lmhp008833	C24H48NO7P	LysoPC 16:1(2n isomer)	Lipids	-	--	1.13629	0.00137866	0.558779	-0.839651	down
pmp001270	C24H48NO7P	LysoPC 16:1	Lipids	76790-27-7	--	1.15508	0.000609183	0.54841	-0.866673	down
Lmhp008688	C25H42NO7P	LysoPE 20:5	Lipids	-	--	1.0905	0.0190643	0.476664	-1.06896	down
Lmhp009497	C25H44NO7P	LysoPE 20:4	Lipids	-	--	1.17093	0.000245124	0.510029	-0.971348	down
Lmhp009349	C25H44NO7P	LysoPE 20:4(2n isomer)	Lipids	-	--	1.1743	0.000189845	0.555794	-0.847378	down
Lmhp009802	C25H46NO7P	LysoPE 20:3(2n isomer)	Lipids	-	--	1.16892	0.00795008	0.504217	-0.987884	down
Lmhp010040	C25H46NO7P	LysoPE 20:3	Lipids	-	--	1.17794	1.4479e-05	0.499317	-1.00197	down
Lmhp010757	C25H48NO7P	LysoPE 20:2	Lipids	-	--	1.16208	0.000248844	0.622124	-0.684725	down
Lmhp010514	C25H48NO7P	LysoPE 20:2(2n isomer)	Lipids	-	--	1.1346	0.00157171	0.657883	-0.604097	down
Hmqp006235	C26H46NO7P	LysoPC 18:4	Lipids	-	--	1.17899	0.00773063	6.03932e-05	-14.0153	down
Lmhp008924	C27H50NO7P	LysoPC 19:3	Lipids	-	--	1.16049	0.000552388	0.424528	-1.23607	down
Lmhp010908	C27H54NO7P	LysoPC 19:1	Lipids	-	--	1.16992	0.00137737	0.562274	-0.830655	down
Lmhp008742	C28H48NO7P	LysoPC 20:5	Lipids	162440-04-2	--	1.1718	0.00340256	0.478556	-1.06324	down
Lmhp009890	C28H52NO7P	LysoPC 20:3	Lipids	1199257-41-4	--	1.17171	0.000552653	0.570317	-0.810165	down
Lmhp010394	C30H54NO7P	LysoPC 22:4	Lipids	-	--	1.17838	3.81623e-06	0.330043	-1.59928	down
mws0251	C5H6N2O2	Thymine	Nucleotides and derivatives	65-71-4	C00178	1.17576	0.00246087	3.8175	1.93263	up
pme0040	C5H5N5	Adenine	Nucleotides and derivatives	73-24-5	C00147	1.17124	0.000263851	1.93302	0.950855	up
pmb0374	C5H5N5	2-Aminopurine	Nucleotides and derivatives	452-06-2	--	1.17796	0.000786078	3.57552	1.83815	up
pme0033	C5H4N4O	Hypoxanthine	Nucleotides and derivatives	68-94-0	C00262	1.17182	0.000233824	1.90893	0.932767	up
pme1109	C5H5N5O	Guanine	Nucleotides and derivatives	73-40-5	C00242	1.17404	2.0159e-05	1.90503	0.929817	up
pme0183	C5H5N5O	Isoguanine	Nucleotides and derivatives	3373-53-3	--	1.17635	0.000700846	2.07017	1.04975	up
mws1641	C6H4N4O2	Lumazine	Nucleotides and derivatives	487-21-8	C03212	1.14134	0.0125247	1.66792	0.738048	up
pme3968	C6H7N5O	7-Methylguanine	Nucleotides and derivatives	578-76-7	C02242	1.17016	0.00270649	1.92789	0.94702	up
pmb2507	C5H11O7P	2-Deoxyribose-1-phosphate	Nucleotides and derivatives	17210-42-3	C00672	1.15761	0.00021099	2.53727	1.34328	up
ML10180524	C9H13N3O5	Cytarabine	Nucleotides and derivatives	147-94-4	C02961	1.17087	0.00265784	1.78562	0.836426	up
mws0248	C9H12N2O6	Uridine	Nucleotides and derivatives	58-96-8	C00299	1.14067	0.0141808	1.81158	0.857246	up
pme0230	C10H13N5O4	Adenosine	Nucleotides and derivatives	58-61-7	C00212	1.17404	0.00288347	3.49947	1.80714	up
Zmyp000878	C10H13N5O5	2-Hydroxyadenosine	Nucleotides and derivatives	1818-71-9	C08432	1.16327	0.00849338	1.87172	0.904367	up
pme1178	C10H13N5O5	Guanosine	Nucleotides and derivatives	118-00-3	C00387	1.17192	0.00420439	1.82408	0.867168	up
pme3174	C9H14N3O8P	Cytidine 5'-monophosphate(Cytidylic acid)	Nucleotides and derivatives	63-37-6	C00055	1.15802	0.00572581	1.74856	0.806171	up
pme3188	C9H13N2O9P	Uridine 5'-monophosphate	Nucleotides and derivatives	58-97-9	C00105	1.11669	0.0176964	1.91105	0.934362	up
mws0884	C10H12N5O6P	Cyclic 3',5'-Adenylic acid	Nucleotides and derivatives	60-92-4	C00575	1.12468	0.0272957	1.9841	0.988482	up
pmc0066	C10H13N4O7P	2'-Deoxyinosine-5'-monophosphate	Nucleotides and derivatives	3393-18-8	C06196	1.15408	0.00124578	1.69725	0.763202	up
mws0874	C10H14N5O7P	3'-Adenylic acid	Nucleotides and derivatives	84-21-9	C01367	1.11199	0.0497987	3.25659	1.70336	up
Zmjn001030	C10H14N5O7P	Adenosine 2'-Phosphate	Nucleotides and derivatives	130-49-4	C00946	1.17565	0.00606063	5.08662	2.34671	up
pmb0981	C10H14N5O7P	Adenosine 5'-monophosphate	Nucleotides and derivatives	61-19-8	C00020	1.17629	0.000177334	2.42169	1.27601	up
pmb0998	C10H14N5O8P	Guanosine 5'-monophosphate	Nucleotides and derivatives	85-32-5	C00144	1.16116	0.00648108	3.76434	1.9124	up
pme1266	C6H6N4O2	3-Methylxanthine	Nucleotides and derivatives	1076-22-8	C16357	1.17883	0.00967041	0.000173311	-12.4943	down
mws1060	C10H12N4O5	9-(Arabinosyl)hypoxanthine	Nucleotides and derivatives	7013-16-3	--	1.16318	0.000286867	0.662753	-0.593457	down
pme1373	C9H14N3O7P	2'-Deoxycytidine-5'-monophosphate	Nucleotides and derivatives	1032-65-1	C00239	1.17914	0.000935135	6.48992e-05	-13.9114	down
pmb0964	C16H23N5O5	Isopentenyladenine-7-N-glucoside	Nucleotides and derivatives	-	--	1.16836	0.000447832	0.448652	-1.15633	down
pme0274	C6H13NO2	6-Aminocaproic acid	Organic acids	60-32-2	C02378	1.1172	0.0139837	1.66697	0.737228	up
Lmbn002862	C7H6O3	3-Hydroxybenzoic acid	Organic acids	99-06-9	C00587	1.17579	3.03878e-05	1.85994	0.895259	up
mws0924	C6H10O4	2-Methylglutaric acid*	Organic acids	617-62-9	--	1.11746	0.0254705	3.11593	1.63966	up
mws0639	C7H6O4	2,3-Dihydroxybenzoic acid*	Organic acids	303-38-8	C00196	1.17909	0.00409753	67965.6	16.0525	up
mws0159	C9H8O3	Phenylpyruvic acid	Organic acids	156-06-9	C00166	1.1787	0.021834	28743	14.8109	up
pme1730	C4H6O4	D-Erythronolactone	Organic acids	15667-21-7	--	1.17901	0.00634747	2.96274e-05	-15.0427	down
mws1167	C4H4O5	Oxaloacetic acid	Organic acids	328-42-7	C00036	1.17831	0.0394441	3.8235e-05	-14.6747	down
mws0473	C5H8O4	2-Methylsuccinic acid*	Organic acids	498-21-5	--	1.1622	0.00317535	0.612507	-0.707201	down
pme0243	C5H8O4	Glutaric acid	Organic acids	110-94-1	C00489	1.16213	0.000284674	0.643367	-0.636287	down
pme3034	C5H8O4	Ethylmalonic acid	Organic acids	601-75-2	--	1.09392	0.0216689	0.506154	-0.982352	down
pme3207	C6H6O4	Muconic acid	Organic acids	1119-72-8	C02480	1.17642	6.12865e-05	0.363153	-1.46135	down
mws0596	C7H7NO3	3-Hydroxyanthranilic acid	Organic acids	548-93-6	C00632	1.15583	0.00221986	0.593617	-0.752397	down
Lmmn001643	C9H8O3	2-Hydroxycinnamic acid*	Organic acids	583-17-5	C01772	1.1386	0.00158877	0.48708	-1.03777	down
ML10176345	C7H8O5	3-Dehydroshikimic acid	Organic acids	2922-42-1	C02637	1.13316	0.0225335	0.613608	-0.704612	down
pme3009	C6H6O6	Trans-Citridic acid	Organic acids	4023-65-8	C02341	1.17915	0.00103856	9.58014e-06	-16.6715	down
Lmgn000242	C6H10O6	4,5,6-Trihydroxy-2-oxohexanoic acid	Organic acids	56742-44-0	C01216	1.13046	0.041157	0.356242	-1.48907	down
Lmmn003323	C16H32O3	2-Hydroxyhexadecanoic acid	Organic acids	764-67-0	--	1.17397	0.000117966	0.658178	-0.603451	down
mws0133	C6H6N2O	Nicotinamide	Others	98-92-0	C00153	1.17682	0.000713677	2.80984	1.49049	up
mws1595	C6H12O5	D-Fucose	Others	3615-37-0	C01018	1.12674	0.00578972	1.73948	0.798654	up
Zmzn000079	C4H9O7P	D-Erythrose-4-phosphate	Others	585-18-2	C00279	1.05428	0.0272423	2.0827	1.05846	up
pme1261	C9H19NO4	D-Panthenol	Others	81-13-0	C05944	1.1757	0.0486433	946.174	9.88596	up
mws0021	C14H12O3	Resveratrol	Others	501-36-0	C03582	1.17742	1.24241e-05	2.93643	1.55406	up
mws2103	C14H12O4	Piceatannol	Others	10083-24-6	C05901	1.16111	6.25903e-05	3.38289	1.75826	up
Zmyn000110	C6H14NO8P	D-Glucosamine 1-phosphate	Others	2152-75-2	C06156	1.12382	0.00267001	1.63377	0.708208	up
pme3313	C6H13O9P	D-Fructose 6-phosphate*	Others	643-13-0	C00085	1.14245	0.0136081	1.66929	0.739238	up
pmb0952	C12H17N4OS+	Thiamine (Vitamin B1)	Others	70-16-6	C00378	1.07516	0.0259537	1.50931	0.593893	up
mws1589	C18H32O16	D-Panose*	Others	33401-87-5	C00713	1.05793	0.0249931	1.61846	0.694626	up
Lmbn002644	C8H8O	4-Methylbenzaldehyde	Others	104-87-0	C06758	1.09386	0.033371	0.408213	-1.29261	down
Hmfn000531	C6H8O6	L-Ascorbic acid (Vitamin C)	Others	50-81-7	C00072	1.0316	0.0172967	0.425809	-1.23172	down
mws0214	C6H14O6	D-Sorbitol	Others	50-70-4	C00794	1.06039	0.0116471	0.660099	-0.599246	down
mws1155	C6H14O6	Mannitol*	Others	69-65-8	C00392	1.11293	0.00660898	0.653377	-0.614012	down
pme2237	C6H14O6	Dulcitol*	Others	608-66-2	C01697	1.16755	0.000155177	0.645459	-0.631603	down
pmp001267	C21H37NO	2-(Dodecylamino)-3-phenyl-1-propanol	Others	-	--	1.06376	0.0299537	0.652969	-0.614914	down
Lmbp008472	C19H18O5	7-Hydroxy-6-methoxy-2-[2-(4-methoxyphenyl)ethyl]chromone	Others	-	--	1.17005	0.00527069	0.395696	-1.33754	down
mws5040	C12H21O11Na	Turanose	Others	547-25-1	C19636	1.17105	0.00166211	0.258033	-1.95437	down
mws0232	C17H20N4O6	Riboflavin (Vitamin B2)	Others	83-88-5	C00255	1.15668	0.00208069	0.639847	-0.644201	down
pmf0249	C27H40O2	δ-Tocotrienol	Others	25612-59-3	C14156	1.17386	0.000128554	0.532987	-0.907827	down
pmn001399	C20H22O9	2,4,6,4'-Tetrahydroxy-stilbene-2-O-glucoside*	Others	-	--	1.09633	0.013856	0.625255	-0.677483	down
Lmgn002679	C6H6O	Phenol	Phenolic acids	108-95-2	C00146	1.17536	0.000112979	1.84862	0.886453	up
pmb0069	C7H7NO	Benzamide	Phenolic acids	55-21-0	C09815	1.17064	0.0043455	6.91767	2.79029	up
ML10179289	C8H10O	2-Phenylethanol	Phenolic acids	60-12-8	C05853	1.17883	0.0183176	304063	18.214	up
Zmzn002575	C6H5NO3	2-Nitrophenol	Phenolic acids	88-75-5	C01988	1.17917	2.18985e-05	224867	17.7787	up
mws0458	C8H8O3	Vanillin	Phenolic acids	121-33-5	C00755	1.16643	0.000106219	1.88137	0.91178	up
mws0180	C7H6O4	2,5-Dihydroxybenzoic acid; Gentisic acid*	Phenolic acids	490-79-9	C00628	1.17857	0.0235741	32748.9	14.9992	up
pmf0440	C10H10O2	4-MethoxycinnaMaldehyde	Phenolic acids	1963-36-6	C10475	1.0352	0.0328851	1.70313	0.768192	up
pme1439	C9H8O3	p-Coumaric acid	Phenolic acids	501-98-4	C00811	1.12548	0.00266236	1.72137	0.783556	up
pme3083	C8H7NO3	2-(Formylamino)benzoic acid	Phenolic acids	3342-77-6	C05653	1.16246	0.0127764	2.15827	1.10987	up
mws0467	C9H10O3	3-(4-Hydroxyphenyl)-propionic acid	Phenolic acids	501-97-3	C01744	1.17903	0.00568655	19940.4	14.2834	up
Zmjn002583	C8H8O4	2',4',6'-Trihydroxyacetophenone	Phenolic acids	480-66-0	C21895	1.1787	0.0164188	14606.3	13.8343	up
mws0028	C8H8O4	Vanillic acid	Phenolic acids	121-34-6	C06672	1.15007	0.000405656	2.15103	1.10502	up
mws0009	C10H10O3	Coniferaldehyde	Phenolic acids	20649-42-7	C02666	1.169	5.6866e-05	3.20412	1.67993	up
pme3255	C11H14O2	Methyleugenol	Phenolic acids	93-15-2	C10454	1.17874	0.0120578	6546.56	12.6765	up
mws0093	C10H12O3	Coniferyl alcohol	Phenolic acids	458-35-5	C00590	1.13505	0.00425731	8.39784	3.07002	up
Lmbn004847	C10H12O3	4-Methoxyphenylpropionic acid	Phenolic acids	-	--	1.17907	0.00302243	4503.41	12.1368	up
mws0014	C10H10O4	Ferulic acid	Phenolic acids	537-98-4	C01494	1.13549	0.00451584	1.73291	0.793195	up
mws0027	C9H10O5	Syringic acid	Phenolic acids	530-57-4	C10833	1.07692	0.00703155	2.61773	1.38831	up
pme3437	C10H12O5	Eudesmic acid (3,4,5-trimethoxybenzoic acid)	Phenolic acids	118-41-2	--	1.14963	0.00147202	1.69473	0.761054	up
mws4085	C11H12O5	Sinapic acid	Phenolic acids	530-59-6	C00482	1.1785	0.0220456	14990.4	13.8718	up
pme3472	C12H16O7	Arbutin	Phenolic acids	497-76-7	C06186	1.17627	0.000177205	1.56206	0.643446	up
Lmtp006213	C17H20O4	3'-Hydroxy-3,4,5-trimethoxybibenzyl	Phenolic acids	-	--	1.14226	0.015054	1.82479	0.86773	up
pmb3142	C13H16O8	Salicylic acid-2-O-glucoside	Phenolic acids	10366-91-3	--	1.16493	0.000377792	2.203	1.13947	up
pmn001516	C14H14O9	5-Galloylshikimic acid	Phenolic acids	95719-51-0	--	1.14909	0.00382993	1.6393	0.713084	up
Zmhn002301	C15H18O8	p-Coumaric acid-4-O-glucoside	Phenolic acids	117405-48-8	C06739	1.11717	0.00221257	1.94861	0.962445	up
Zmhn001883	C14H18O9	Vanillic acid-4-O-glucoside	Phenolic acids	32142-31-7	--	1.12789	0.00821419	1.53135	0.614805	up
pmn001517	C15H22O8	3,4,5-Trimethoxyphenyl-1-O-Glucoside	Phenolic acids	-	--	1.13094	0.00843244	2.02893	1.02072	up
Zmhn002422	C16H20O9	1-O-Feruloyl-D-Glucose	Phenolic acids	-	C17759	1.08383	0.00905421	1.85611	0.892282	up
pmb3107	C15H20O10	Glucosyringic acid	Phenolic acids	-	--	1.15594	0.000417485	2.19045	1.13123	up
Cmzn005251	C21H22O10	6-O-Caffeoylarbutin	Phenolic acids	136172-60-6	--	1.04217	0.0240112	1.77964	0.831583	up
pmb2654	C19H27NO12	Anthranilate-1-O-Sophoroside	Phenolic acids	-	--	1.15216	0.0016861	1.53934	0.622311	up
Lmhn002321	C21H18O12	Vnilloylcaffeoyltartaric acid	Phenolic acids	-	--	1.17902	0.00715015	40558.1	15.3077	up
Zmhn000785	C19H32O16	Di-O-Glucosylquinic acid	Phenolic acids	-	--	1.1033	0.042464	2.01641	1.01179	up
pmb2936	C28H32O14	Disinapoyl glucoside	Phenolic acids	-	--	1.14097	0.00086915	2.67607	1.42012	up
pme2828	C6H5NO3	4-Nitrophenol	Phenolic acids	100-02-7	C00870	1.17897	9.79653e-05	0.0476255	-4.39212	down
Lmbn002739	C9H8O3	3-Hydroxycinnamic acid	Phenolic acids	14755-02-3	C12621	1.17294	0.00593653	0.367994	-1.44224	down
Lmbn002648	C9H8O3	α-Hydroxycinnamic acid*	Phenolic acids	5801-57-0	C02763	1.15268	0.0145916	0.472853	-1.08054	down
mws2212	C9H8O4	Caffeic acid	Phenolic acids	331-39-5	C01197	1.16808	0.00481664	0.336696	-1.57048	down
HJAP052	C10H12O4	2,4,5-Trimethoxybenzaldehyde	Phenolic acids	4460-86-0	--	1.05406	0.0149884	0.536318	-0.898839	down
mws1509	C13H10O3	Phenyl salicylate	Phenolic acids	118-55-8	C14163	1.17906	0.00230053	0.000418501	-11.2225	down
HJAP044	C12H16O4	1-(2,4,5-Trimethoxyphenyl)propan-1-one	Phenolic acids	3904-18-5	--	1.11128	0.00168936	0.268893	-1.8949	down
Lmhn102068	C13H12O8	2-O-Caffeoylmalic acid	Phenolic acids	53755-04-7	--	1.11001	0.000843499	0.279384	-1.83968	down
Lmhn001477	C13H12O9	2-Caffeoyl-L-tartaric acid (Caftaric acid)	Phenolic acids	67879-58-7	--	1.16352	0.00638839	0.561559	-0.832489	down
Lmfn000604	C13H16O10	6-O-Galloyl-glucose	Phenolic acids	13186-19-1	--	1.17905	0.00644716	1.06937e-05	-16.5129	down
mws2108	C16H18O9	Cryptochlorogenic acid	Phenolic acids	905-99-7	--	1.17778	0.0478772	0.000161048	-12.6002	down
Lmbp002309	C17H22O9	Sinapaldehyde-4-O-Glucoside	Phenolic acids	154461-65-1	--	1.10141	0.00494484	0.593927	-0.751642	down
Lmhn001773	C19H13NO10	Caffeoylnicotinoyltartaric acid	Phenolic acids	-	--	1.15522	0.0114661	0.484529	-1.04534	down
Lmhn003494	C20H16O10	Caffeoylbenzoyltartaric acid	Phenolic acids	-	--	1.17748	1.83768e-05	0.407093	-1.29657	down
Lmhn204620	C22H18O9	Bis(p-Coumaroyl)malic acid	Phenolic acids	-	--	1.15129	0.00155835	0.546098	-0.872769	down
Lmhn002574	C20H16O11	Caffeoyl(p-Hydroxybenzoyl)tartaric acid	Phenolic acids	-	--	1.1716	0.000278708	0.447164	-1.16112	down
Zmhn002690	C22H24O10	4-O-(6'-O-Glucosylcaffeoyl)-4-hydroxybenzyl alcohol	Phenolic acids	-	--	1.16098	0.000134409	0.352475	-1.50441	down
Lmhn004756	C23H20O10	Cinnamoylferuloyltartaric acid	Phenolic acids	-	--	1.15536	0.00975977	0.599927	-0.737141	down
Lmhn002683	C22H18O11	p-Coumaroylcaffeoyltartaric acid	Phenolic acids	-	--	1.17785	7.4428e-07	0.404392	-1.30617	down
mad2085	C22H18O11	Caffeoyl-p-coumaroyltartaric acid	Phenolic acids	-	--	1.11543	0.00286551	0.26015	-1.94258	down
Lmhn003689	C23H20O11	p-Coumaroylferuloyltartaric acid	Phenolic acids	-	--	1.176	0.000120016	0.662628	-0.593728	down
mws1714	C22H18O12	Chicoric acid	Phenolic acids	70831-56-0	C10437	1.1711	0.000261516	0.26455	-1.91839	down
Lmhn002895	C23H20O12	Feruloylcaffeoyltartaric acid	Phenolic acids	-	--	1.16382	0.00228273	0.425741	-1.23195	down
Lmhn003799	C24H22O12	Feruloylferuloyltartaric acid	Phenolic acids	-	--	1.16611	0.000825579	0.563941	-0.826384	down
Lmhn003246	C24H22O13	Sinapoylcaffeoyltartaric acid	Phenolic acids	-	--	1.14979	0.018367	0.480744	-1.05666	down
Zmsp001834	C8H8O4	2,6-Dimethoxy-1,4-benzoquinone	Quinones	530-55-2	C10331	1.13859	0.0303699	2.13455	1.09393	up
pmp001126	C16H12O5	7-Hydroxy-5,6-dimethoxy-1,4-phenanthrenequinone	Quinones	-	--	1.1487	0.00503799	0.627868	-0.671466	down
pmp001118	C16H12O5	5-Hydroxy-3,7dimethoxy-1,4-phenanthrenequinone	Quinones	-	--	1.15174	0.00194782	0.494129	-1.01704	down
Hmbn004734	C29H44O4	30-Norhederagenin	Steroids	117654-06-5	--	1.12928	0.00269211	0.648997	-0.623716	down
Hmgp005956	C13H18O3	Dehydrovomifoliol	Terpenoids	15764-81-5	C02533	1.14137	0.0032988	1.77236	0.825668	up
Lmsp013116	C20H32O3	Ent-16α,17-Dihydroxykauran-2-one	Terpenoids	-	--	1.12698	0.00365248	1.52874	0.612345	up
Hmjn003948	C30H48O5	Madasiatic acid	Terpenoids	26532-66-1	--	1.17533	0.000321395	1.82009	0.864009	up
Lmmp006330	C42H66O16	Bayogenin-3-O-glucuronide-28-O-glucoside	Terpenoids	-	--	1.17337	0.000331742	1.51796	0.602134	up
pmp000199	C48H74O17	Soyasaponin γg	Terpenoids	-	--	1.17327	0.000562821	3.18045	1.66923	up
Lmmp006307	C48H76O20	Bayogenin-3-O-glucuronide-28-O-(2''-O-Rhamnosyl)glucoside	Terpenoids	-	--	1.15656	0.00112003	1.54294	0.625685	up
pmp000205	C54H84O21	Soyasaponin βg (Soyasaponin VI)	Terpenoids	143519-54-4	--	1.17717	0.000132114	2.11745	1.08233	up
Lmdp002381	C11H14O5	Genipin	Terpenoids	6902-77-8	C09780	1.14347	0.00192512	0.632278	-0.66137	down
Hmjn008136	C30H46O4	Camaldulenic acid	Terpenoids	71850-15-2	--	1.12925	0.0183078	0.528157	-0.920961	down
Lmsn006046	C36H58O11	2α,3β,19α,23-Tetrahydroxyurs-12-en-28-oic acid-28-O-glucoside	Terpenoids	-	--	1.12728	0.0156983	0.482437	-1.05159	down

## Sheet: MS-R vs. IS-R
Index	Formula	Compounds	Class	CAS_ID	cpd_ID	VIP	p_value	Fold_Change	Log2FC	Type
pmb1096	C8H7N	Indole	Alkaloids	120-72-9	C00463	1.13593	9.27307e-08	2.0082	1.0059	up
pmp001198	C6H13NO2	6-Deoxyfagomine	Alkaloids	197449-09-5	--	1.13306	0.00101133	2.15162	1.10543	up
pme2268	C7H7NO2	Trigonelline	Alkaloids	535-83-1	C01004	1.12255	0.00107028	1.50181	0.586699	up
Lmgp000796	C8H7NO2	4-Hydroxymandelonitrile	Alkaloids	13093-65-7	C00650	1.12821	0.00334871	1.66003	0.73121	up
mws1346	C6H11NO4	DL-2-Aminoadipic acid	Alkaloids	542-32-5	C00956	1.12961	2.87883e-05	2.67022	1.41696	up
pmb0037	C10H15NO	Hordenine	Alkaloids	539-15-1	C06199	1.13562	0.0211991	6237.74	12.6068	up
mws1105	C11H14N2	Gramine	Alkaloids	87-52-5	C08304	1.10777	0.00054821	2.05219	1.03716	up
pme2024	C10H12N2O	Serotonin*	Alkaloids	50-67-9	C00780	1.12424	0.00292854	1.66235	0.733223	up
pmb0774	C10H12N2O	N-Hydroxytryptamine*	Alkaloids	-	C17203	1.12368	0.000133515	1.6095	0.686616	up
Hmmp001310	C11H9NO2	3-Indoleacrylic acid	Alkaloids	1204-06-4	C21283	1.1232	0.000744878	2.1357	1.09471	up
pme2244	C11H11NO2	3-Indolepropionic acid	Alkaloids	830-96-6	--	1.12114	0.000357879	2.10836	1.07612	up
Lmmp002080	C11H16N2O	N-(4-Aminobutyl)benzamide	Alkaloids	5692-23-9	--	1.12069	0.00790387	2.61972	1.38941	up
Smjp001258	C12H14N2O2	Abrine	Alkaloids	-	--	1.13468	0.000911898	3.04253	1.60527	up
Lmlp003161	C14H20N2O3	N-Feruloylputrescine	Alkaloids	501-13-3	C10497	1.12783	6.2128e-05	1.52686	0.610563	up
Lmmp002013	C14H22N2O3	Dihydroferuloylputrescine	Alkaloids	-	--	1.06132	0.00565643	1.51989	0.603965	up
Hmtn001358	C14H17NO7	2-(D-Glucosyloxy)-4-hydroxybenzeneacetonitrile	Alkaloids	-	--	1.12489	0.000607052	1.59128	0.670184	up
mws0983	C20H39NO2	N-Oleoylethanolamine	Alkaloids	111-58-0	C20792	1.13601	2.36782e-05	3.85789	1.94781	up
pmb0770	C20H20N2O4	N-Feruloylserotonin	Alkaloids	68573-23-9	--	1.13442	0.00271318	4.11873	2.0422	up
pmb0064	C15H19NO10	DIMBOA glucoside	Alkaloids	18607-79-9	C04831	1.13574	0.000197003	4.36061	2.12453	up
Lmhp005550	C24H28N2O6	N,N'-Diferuloylputrescine	Alkaloids	42369-86-8	--	1.13128	8.64013e-06	3.99362	1.9977	up
Lmtp000829	C24H26N2O13	Gomphrenin I (betanidin 6-O-β-glucoside)	Alkaloids	17008-59-2	C08544	1.12504	0.000234859	2.3906	1.25737	up
Hmlp002408	C14H17NO8	HBOA-2-O-glucoside	Alkaloids	27625-86-1	--	1.13624	0.00117823	7.62238e-06	-17.0013	down
pme0120	C5H11NO2	5-Aminovaleric acid	Amino acids and derivatives	660-88-8	C00431	1.13615	0.00641778	5224.26	12.351	up
mws0256	C5H11NO2	L-Valine	Amino acids and derivatives	72-18-4	C00183	1.13543	3.58962e-05	2.36404	1.24126	up
mws0216	C5H9NO3	Trans-4-Hydroxy-L-proline	Amino acids and derivatives	51-35-4	C01157	1.13327	3.73557e-06	3.85239	1.94575	up
mws0258	C6H13NO2	L-Isoleucine*	Amino acids and derivatives	73-32-5	C00407	1.09595	0.00111617	2.02141	1.01536	up
mws0227	C6H13NO2	L-Leucine*	Amino acids and derivatives	61-90-5	C00123	1.12797	0.0001396	2.06226	1.04423	up
pme0057	C4H9NO2S	L-Homocysteine	Amino acids and derivatives	6027-13-0	C00155	1.10225	0.0117396	1.96428	0.973997	up
pme1002	C8H11NO	L-Tyramine	Amino acids and derivatives	51-67-2	C00483	1.12669	0.00150525	1.86153	0.896492	up
pme0193	C5H10N2O3	L-Glutamine	Amino acids and derivatives	56-85-9	C00064	1.13188	7.90361e-05	2.31384	1.21029	up
pme0026	C6H14N2O2	L-Lysine	Amino acids and derivatives	56-87-1	C00047	1.12928	2.94971e-05	2.37994	1.25093	up
mws1050	C5H9NO4	O-Acetylserine	Amino acids and derivatives	5147-00-2	C00979	1.08771	0.00256701	1.63432	0.708691	up
pme1210	C5H11NO2S	L-Methionine	Amino acids and derivatives	63-68-3	C00073	1.1328	0.000388515	1.72419	0.785922	up
mws0254	C6H9N3O2	L-Histidine	Amino acids and derivatives	71-00-1	C00135	1.1344	6.33021e-06	2.11929	1.08358	up
pme2914	C6H10O5	3-Hydroxy-3-methylpentane-1,5-dioic acid	Amino acids and derivatives	503-49-1	C03761	1.13532	0.000349759	2.44249	1.28835	up
Lmbp000123	C6H13NO2S	L-Homomethionine	Amino acids and derivatives	25148-30-5	C17213	1.13437	0.00163652	3.16196	1.66082	up
Zmyn000155	C7H14N2O3	N-α-Acetyl-L-ornithine	Amino acids and derivatives	6205-08-9	C00437	1.12951	0.000626505	1.59029	0.669292	up
mws0260	C6H14N4O2	L-Arginine	Amino acids and derivatives	74-79-3	C00062	1.13326	0.00168464	1.93734	0.954079	up
pmb0468	C6H11NO3S	N-Formyl-L-Methionine	Amino acids and derivatives	4289-98-9	C03145	1.1158	0.00116983	1.69513	0.761395	up
pme0122	C8H16N2O3	N6-Acetyl-L-lysine	Amino acids and derivatives	692-04-6	C02727	1.12808	0.000853529	2.07085	1.05022	up
Zmjp000182	C7H16N4O2	N-Monomethyl-L-arginine	Amino acids and derivatives	17035-90-4	C03884	1.12617	0.00236533	1.88429	0.914019	up
pme3388	C7H16N4O2	Homoarginine	Amino acids and derivatives	156-86-5	C01924	1.09345	0.00147362	1.98053	0.985889	up
NK10251888	C8H18N4O2	NG,NG-Dimethyl-L-arginine	Amino acids and derivatives	30315-93-6	C03626	1.12608	0.00199051	2.00005	1.00003	up
pme0170	C8H16N4O3	N-Acetyl-L-Arginine	Amino acids and derivatives	155-84-0	--	1.12366	0.00359169	1.83162	0.873122	up
pme2566	C8H14N2O5	5-L-Glutamyl-L-amino acid	Amino acids and derivatives	5875-41-2	--	1.12008	0.00198954	2.6833	1.42401	up
pme1228	C11H12N2O3	5-Hydroxy-L-tryptophan	Amino acids and derivatives	56-69-9	C00643	1.10628	0.000795164	2.08726	1.06161	up
Lmrj002087	C10H18N2O5	L-Isoleucyl-L-Aspartate	Amino acids and derivatives	-	--	1.12583	0.00213706	1.81759	0.862027	up
pme2890	C8H16N2O4S2	L-Homocystine	Amino acids and derivatives	626-72-2	C01817	1.11584	0.0119317	1.80665	0.853318	up
mws0629	C13H16N2O5	L-Aspartyl-L-Phenylalanine	Amino acids and derivatives	13433-09-5	--	1.11249	0.00248406	1.56755	0.648514	up
mws1375	C12H21N3O6	Nicotianamine	Amino acids and derivatives	34441-14-0	C05324	1.13094	1.74146e-05	2.40328	1.26501	up
mws0582	C11H19N3O6S	S-(Methyl)glutathione	Amino acids and derivatives	2922-56-7	C11347	1.0861	0.0143352	1.67266	0.742142	up
pme2735	C15H22N6O5S	S-Adenosyl-L-methionine	Amino acids and derivatives	29908-03-0	C00019	1.08782	0.00163808	2.01341	1.00964	up
ML10181668	C6H11NO2	Cycloleucine*	Amino acids and derivatives	52-52-8	C03969	1.10206	0.00148996	0.664628	-0.589381	down
pmb0962	C10H22N2O4	L-Lysine-Butanoic acid	Amino acids and derivatives	80407-71-2	--	1.09484	0.00117115	0.299092	-1.74134	down
pme3285	C15H14O5	Afzelechin (3,5,7,4'-Tetrahydroxyflavan)	Flavonoids	2545-00-8	C09320	1.13091	2.21992e-05	3.15314	1.65679	up
mws1068	C15H10O6	Kaempferol (3,5,7,4'-Tetrahydroxyflavone)	Flavonoids	520-18-3	C05903	1.10543	0.000297216	2.89342	1.53277	up
pmp000566	C16H14O5	Claussequinone	Flavonoids	35878-39-8	--	1.10639	0.000316654	3.51252	1.81251	up
pme0460	C15H14O6	Epicatechin	Flavonoids	490-46-0	C09727	1.13609	1.3499e-05	5.08633	2.34663	up
Lmhn005110	C16H12O6	Aracarpene 1	Flavonoids	1261245-78-6	--	1.12752	0.000124255	3.52181	1.81632	up
mws0032	C15H10O8	Myricetin	Flavonoids	529-44-2	C10107	1.1306	0.00120437	2.45989	1.29859	up
pmp000637	C20H20O5	Sophoraflavanone B	Flavonoids	53846-50-7	C18023	1.13502	0.0286026	2016.96	10.978	up
pmp000638	C20H18O6	8-Prenylkaempferol	Flavonoids	28610-31-3	--	1.1311	9.95292e-07	7.04892	2.8174	up
HJAP012	C20H18O10	Luteolin-8-C-arabinoside	Flavonoids	-	--	1.13609	1.9403e-07	4.78176	2.25754	up
mws0895	C21H20O10	Genistein-7-O-Glucoside (Genistin)	Flavonoids	529-59-9	C09126	1.12384	0.00060011	2.55094	1.35103	up
mws0919	C21H20O10	Kaempferol-3-O-rhamnoside (Afzelin)(Kaempferin)	Flavonoids	482-39-3	C16911	1.07702	0.00252804	4.31899	2.11069	up
pme2459	C21H20O11	Luteolin-7-O-glucoside (Cynaroside)	Flavonoids	5373-11-5	C03951	1.13473	0.000689454	2.37313	1.24679	up
mws2209	C21H20O11	Kaempferol-3-O-glucoside (Astragalin)	Flavonoids	480-10-4	C12249	1.11339	0.0171261	1.75353	0.810261	up
Lmtn002796	C21H22O11	Dihydrokaempferol-7-O-glucoside	Flavonoids	28189-90-4	--	1.06211	0.0187485	1.52053	0.604579	up
HJN041	C21H24O11	Epicatechin glucoside	Flavonoids	-	--	1.12616	0.000935647	3.19456	1.67562	up
Xmsn002700	C21H22O12	Taxifolin-3'-O-glucoside	Flavonoids	31106-05-5	--	1.126	0.000143285	4.76778	2.25332	up
Lmcp003402	C22H22O12	Tamarixetin-3-O-glucoside (Tamarixin)	Flavonoids	27542-39-8	--	1.1361	0.0152908	84973.3	16.3747	up
Lmmn003398	C23H22O12	Kaempferol-3-O-(6''-acetyl)glucoside	Flavonoids	-	--	1.07995	0.030952	1.76755	0.82175	up
pmp000013	C24H26O12	Eupatilin-7-O-glucoside	Flavonoids	-	--	1.13107	2.83941e-05	2.86229	1.51717	up
pmp000194	C24H22O13	6''-O-Malonylgenistin	Flavonoids	51011-05-3	C16192	1.11491	0.00992647	2.55505	1.35335	up
pmp000585	C24H22O13	Apigenin-7-O-(6''-malonyl)glucoside	Flavonoids	86546-87-4	C10020	1.11795	0.00500418	2.60637	1.38204	up
Lmtp002942	C25H26O13	Apigenin-6,8-di-C-arabinoside	Flavonoids	-	--	1.12705	0.00411319	4.36312	2.12536	up
pmb0608	C25H24O14	Chrysoeriol-7-O-(6''-malonyl)glucoside	Flavonoids	-	--	1.13395	0.0012248	2.6097	1.38388	up
pmp000588	C25H24O14	Diosmetin-7-O-(6''-malonyl)glucoside	Flavonoids	-	--	1.12432	0.000221709	2.92352	1.54771	up
Hmln002189	C24H22O15	Quercetin-3-O-(6''-malonyl)galactoside	Flavonoids	-	--	1.12397	0.00184773	6.68057	2.73997	up
HJAP010	C25H26O14	Luteolin-6,8-di-C-arabinoside	Flavonoids	-	--	1.13505	0.000925914	4.98506	2.31761	up
mws1292	C26H28O14	Isoschaftoside	Flavonoids	52012-29-0	--	1.13106	0.00368275	1.73363	0.793795	up
mws1660	C26H28O14	Schaftoside	Flavonoids	51938-32-0	C10181	1.09918	0.00796831	1.66818	0.738274	up
Lmnp003080	C26H28O14	Hispidulin-8-C-(2''-O-xylosyl)xyloside	Flavonoids	-	--	1.1339	1.51507e-06	3.48716	1.80205	up
Lmtp002642	C26H28O14	Apigenin-8-C-(2''-glucosyl)arabinoside	Flavonoids	-	--	1.13121	0.00174697	1.98142	0.986532	up
Lmtp002474	C26H28O14	Apigenin-6-C-(2''-glucosyl)arabinoside	Flavonoids	-	--	1.13028	0.000459431	1.71544	0.778577	up
Lmpp003930	C30H26O12	Apigenin-7-O-(6''-p-Coumaryl)glucoside	Flavonoids	-	--	1.12532	0.00136956	1.69986	0.765418	up
pme0368	C27H30O14	Apigenin-7-O-rutinoside (Isorhoifolin)	Flavonoids	552-57-8	--	1.12493	0.00313167	2.07097	1.05031	up
HJAP148	C26H28O15	Kaempferol-3-O-sambubioside	Flavonoids	27661-51-4	--	1.13078	5.79868e-05	2.4508	1.29326	up
pmb0631	C26H28O15	Orientin-6-C-arabinoside	Flavonoids	-	--	1.13021	0.00369328	2.68332	1.42402	up
Hmgp003641	C28H32O14	Chrysoeriol-6-C-rhamnoside-7-O-rhamnoside	Flavonoids	-	--	1.13605	6.44177e-05	3.6665	1.87441	up
Lmlp002990	C27H30O15	Isosaponarin(Isovitexin-4'-O-glucoside)	Flavonoids	19416-87-6	--	1.13618	6.47311e-07	2.48178	1.31137	up
Lmjp002867	C27H30O15	Kaempferol-3-O-neohesperidoside	Flavonoids	32602-81-6	--	1.12694	6.40371e-06	6.76023	2.75707	up
mws1073	C27H30O15	Apigenin-6,8-di-C-glucoside (Vicenin-2)	Flavonoids	23666-13-9	C10195	1.12637	0.000387632	1.5106	0.595125	up
Lmnp102682	C27H30O15	Hispidulin-8-C-(2''-O-xylosyl)glucoside	Flavonoids	-	--	1.12698	0.00203672	1.82892	0.870992	up
Lmjp002596	C26H28O16	Quercetin-3-O-sambubioside	Flavonoids	83048-35-5	C12637	1.11131	0.000541307	5.79303	2.53432	up
pmp001080	C28H32O15	Diosmetin-7-O-Neohesperidoside (Neodiosmin)*	Flavonoids	38665-01-9	--	1.12086	0.000195953	1.6039	0.681585	up
mws1661	C28H32O15	Diosmetin-7-O-rutinoside (Diosmin)*	Flavonoids	520-27-4	C10039	1.13622	3.95861e-05	1.501	0.585926	up
pmb0624	C27H30O16	Isoorientin-7-O-glucoside	Flavonoids	-	--	1.11401	0.000467757	1.96371	0.97358	up
pmp001290	C27H26O17	Apigenin-7-O-(2''-glucurosyl)glucuronide	Flavonoids	74696-01-8	--	1.12117	0.00020752	3.17111	1.66499	up
pme1540	C28H32O16	Isorhamnetin-3-O-neohesperidoside	Flavonoids	55033-90-4	--	1.13526	0.000689547	4.23297	2.08167	up
pmp000127	C28H32O16	Chrysoeriol-6,8-di-C-glucoside	Flavonoids	-	--	1.13509	0.00133711	3.43272	1.77935	up
pmp001289	C28H28O18	Chrysoeriol-7-O-(2''-O-glucuronyl)glucuronide	Flavonoids	-	--	1.1325	5.16431e-05	3.63207	1.86079	up
Hmgp002953	C29H32O17	Tricin-7-O-(2''-O-rhamnosyl)galacturonide	Flavonoids	89915-54-8	--	1.11519	0.000699392	1.89206	0.919958	up
pmb0578	C32H30O15	Luteolin-7-O-(6''-sinapoyl)glucoside	Flavonoids	-	--	1.13546	0.000160309	3.25853	1.70422	up
pmb0579	C33H32O15	Chrysoeriol-7-O-(6''-sinapoyl)glucoside	Flavonoids	-	--	1.13583	1.85541e-05	3.33491	1.73765	up
Hmgp002564	C29H30O19	Tricin-7-O-glucuronyl(2→1)glucuronide	Flavonoids	83097-44-3	--	1.132	0.000393531	2.07566	1.05357	up
Zmlp003063	C33H40O19	Luteolin-7-O-(2''-O-rhamnosyl)rutinoside	Flavonoids	-	--	1.1349	0.000775791	5.55887	2.47479	up
Lmyp003837	C33H40O19	Isovitexin-7-O-glucoside-2''-O-rhamnoside	Flavonoids	-	--	1.1289	1.99169e-05	6.00534	2.58625	up
pmb0691	C33H40O20	Isoorientin-7-O-(2''-rhamnosyl)glucoside	Flavonoids	-	--	1.12573	0.000397077	1.52775	0.611406	up
pmp000344	C15H10O5	3',4',7-Trihydroxyflavone	Flavonoids	2150-11-0	--	1.1358	0.0149323	0.000131421	-12.8935	down
mws0063	C15H10O5	Genistein	Flavonoids	446-72-0	C06563	1.13533	0.018258	0.000374875	-11.3813	down
pmp000571	C15H10O5	Apigenin	Flavonoids	520-36-5	C01477	1.09351	0.00126602	0.445267	-1.16726	down
pme3475	C15H12O5	Butin*	Flavonoids	492-14-8	C09614	1.12214	0.000389247	0.575637	-0.796769	down
pme2960	C15H12O5	Naringenin chalcone*	Flavonoids	73692-50-9	C06561	1.12201	0.000191169	0.562045	-0.831242	down
pme0376	C15H12O5	Naringenin (5,7,4'-Trihydroxyflavanone)*	Flavonoids	480-41-1	C00509	1.12286	0.000233663	0.614779	-0.701861	down
pmp000001	C16H12O6	Hispidulin (5,7,4'-Trihydroxy-6-methoxyflavone)	Flavonoids	1447-88-7	C10058	1.13464	1.40182e-05	0.65983	-0.599833	down
Lmcp004624	C16H12O6	3-Methylkaempferol*	Flavonoids	1592-70-7	C05902	1.13613	0.00765467	0.000174277	-12.4863	down
Lmzp004885	C17H14O7	Tricin (5,7,4'-Trihydroxy-3',5'-dimethoxyflavone)	Flavonoids	520-32-1	C10193	1.13247	0.00138125	0.547766	-0.868369	down
pmb3031	C20H20O9	Tricin-4'-O-glycerol	Flavonoids	-	--	1.11029	0.000603791	0.576735	-0.794019	down
pmp000413	C21H20O10	Genistein-8-C-glucoside	Flavonoids	66026-80-0	C10420	1.12765	5.10406e-05	0.489888	-1.02948	down
mws0048	C21H20O10	Apigenin-8-C-Glucoside (Vitexin)*	Flavonoids	3681-93-4	C01460	1.13228	0.00348365	0.362579	-1.46363	down
mws1434	C21H20O10	Apigenin-6-C-glucoside (Isovitexin)*	Flavonoids	29702-25-8	C01714	1.1271	0.00835876	0.37333	-1.42148	down
Lmlp006175	C21H22O10	Isosalipurposide (Phlorizin Chalcone)	Flavonoids	4547-85-7	C16406	1.10253	0.000899105	0.60502	-0.724944	down
mws1608	C21H20O11	Luteolin-6-C-glucoside (Isoorientin)	Flavonoids	4261-42-1	C01821	1.12407	0.00166615	0.436527	-1.19586	down
Hmpp003270	C21H20O11	Luteolin-4'-O-glucoside	Flavonoids	6920-38-3	--	1.12922	2.48117e-05	0.324563	-1.62343	down
mws1299	C21H20O11	Luteolin-8-C-glucoside (Orientin)	Flavonoids	28608-75-5	C10114	1.13429	0.000259954	0.442109	-1.17752	down
HJN086	C21H22O11	Eriodictyol-3'-O-glucoside	Flavonoids	-	--	1.1124	0.000447013	0.346198	-1.53033	down
pmb3012	C22H22O11	Chrysoeriol-7-O-glucoside	Flavonoids	19993-32-9	--	1.13628	2.25296e-05	1.30926e-05	-16.2209	down
pmb0629	C22H22O11	Chrysoeriol-6-C-glucoside (Isoscoparin)	Flavonoids	20013-23-4	C05990	1.1325	0.00148074	0.447011	-1.16162	down
Lmdp003286	C21H20O12	Isohyperoside	Flavonoids	35589-21-0	--	1.13629	0.000535171	1.74096e-05	-15.8098	down
mws0061	C21H20O12	Quercetin-3-O-galactoside (Hyperin)	Flavonoids	482-36-0	C10073	1.11449	0.00129962	0.370889	-1.43094	down
mws0091	C21H20O12	Quercetin-3-O-glucoside (Isoquercitrin)	Flavonoids	482-35-9	C05623	1.02071	0.0223663	0.596934	-0.744357	down
pmp000235	C27H26O11	Salcolin B	Flavonoids	-	--	1.13229	0.000158517	0.663935	-0.590886	down
pme3227	C27H30O14	Vitexin-2''-O-rhamnoside	Flavonoids	64820-99-1	C12628	1.10159	0.0016726	0.660432	-0.598517	down
Zmhp002409	C27H30O16	Isoluteolin-6,8-di-C-glucoside	Flavonoids	-	--	1.1349	8.0127e-07	0.327953	-1.60844	down
HJAP024	C27H30O16	Kaempferol-6,8-di-C-glucoside*	Flavonoids	-	--	1.13438	0.00201779	0.318147	-1.65223	down
HJN051	C28H32O16	Tamarixetin-3-O-rutinoside	Flavonoids	-	--	1.13621	0.00368194	0.000168052	-12.5388	down
pmb0719	C32H34O15	Tricin-4'-O-(syringyl alcohol)ether-5-O-glucoside	Flavonoids	-	--	1.13197	6.20564e-05	0.366201	-1.44929	down
pmb1312	C33H36O16	Tricin-4'-O-(guaiacylglycerol)ether-7-O-glucoside	Flavonoids	-	--	1.13421	0.000673627	0.489737	-1.02992	down
mws1014	C10H8O5	Fraxetin (7,8-Dihydroxy-6-methoxycoumarin)	Lignans and Coumarins	574-84-5	C09265	1.13547	0.0401385	67570	16.0441	up
Lmbp003825	C15H16O8	Skimmin (7-Hydroxycoumarin-7-O-glucoside)	Lignans and Coumarins	93-39-0	--	1.10514	0.012719	2.10965	1.077	up
Lmtn003096	C26H36O11	Secoisolariciresinol 4-O-glucoside	Lignans and Coumarins	-	--	1.12162	0.000426867	1.64856	0.721206	up
Lmbn001181	C22H28O15	Fraxetin-7,8-di-O-glucoside	Lignans and Coumarins	-	--	1.13624	0.00163979	74487.8	16.1847	up
pmn001375	C26H32O12	1-Hydroxypinoresinol-1-O-Glucoside	Lignans and Coumarins	81495-71-8	--	1.07777	0.0268144	1.5898	0.668847	up
Lmdn001925	C26H34O12	Olivil-4'-O-glucoside	Lignans and Coumarins	76880-93-8	--	1.10095	0.00133096	3.49332	1.8046	up
Lmmn002260	C27H36O12	5'-Methoxyisolariciresinol-9'-O-glucoside	Lignans and Coumarins	-	--	1.11926	0.000281212	1.56534	0.64648	up
pmn001369	C32H42O17	1-Hydroxypineolin Diglucoside	Lignans and Coumarins	-	--	1.10155	0.0244398	2.45584	1.29622	up
pmn001492	C11H8O3	Ayapin	Lignans and Coumarins	494-56-4	C18078	1.09521	0.0105967	0.657955	-0.603938	down
pmb2640	C12H24O2	Dodecanoic acid (Lauric acid)	Lipids	143-07-7	C02679	1.12742	0.000108452	1.58803	0.667235	up
mws0359	C15H30O2	Pentadecanoic acid	Lipids	1002-84-2	C16537	1.11355	0.0154781	1.55557	0.63744	up
mws0361	C16H30O2	Palmitoleic acid	Lipids	373-49-9	C08362	1.1055	0.0157972	2.30506	1.20481	up
Hmsn000210	C17H30O2	Methyl 7,10-hexadecadienoate	Lipids	-	--	1.13486	0.000154448	3.36406	1.7502	up
mws0383	C17H32O2	10-Heptadecenoic acid	Lipids	29743-97-3	--	1.08851	0.0333957	1.58343	0.663057	up
mws1355	C16H32O3	16-Hydroxyhexadecanoic acid	Lipids	506-13-8	C18218	1.09747	0.00323212	1.9715	0.979292	up
pmb1574	C18H28O2	9,12-Octadecadien-6-Ynoic acid	Lipids	61481-29-6	--	1.12078	0.00104938	1.76026	0.81579	up
Lmbn005923	C18H30O2	Crepenynic acid	Lipids	2277-31-8	C07289	1.12587	0.000102502	1.55973	0.641296	up
Zmyn004548	C18H28O3	12-Oxo-phytodienoic acid	Lipids	85551-10-6	C01226	1.12925	0.00515089	1.72154	0.783696	up
Lmbn005443	C18H30O3	13-KODE; (9Z,11E)-13-Oxooctadeca-9,11-dienoic acid*	Lipids	54739-30-9	C14765	1.08036	0.0225365	1.66561	0.736051	up
pmb2786	C18H30O3	9-Hydroxy-10,12,15-octadecatrienoic acid*	Lipids	89886-42-0	C16326	1.11097	0.00377548	1.6251	0.700528	up
ML10195036	C18H37NO2	3-Dehydrosphinganine	Lipids	16105-69-4	C02934	1.1231	0.00299529	1.85802	0.893769	up
Zmyn005384	C18H36O3	2R-Hydroxyoctadecanoic acid	Lipids	26633-48-7	C03042	1.13483	0.000360687	2.95684	1.56406	up
mws0369	C20H32O2	Arachidonic acid	Lipids	506-32-1	C00219	1.13537	5.86166e-06	1.72839	0.789429	up
pmn001610	C20H36O2	Eicosadienoic acid	Lipids	5598-38-9	C16525	1.1322	0.000173052	1.88604	0.915363	up
pmb2221	C18H39NO3	4-Hydroxysphinganine	Lipids	554-62-1	C12144	1.13587	3.49987e-07	1.63849	0.712366	up
Lmhp011562	C21H36O4	1-α-Linolenoyl-glycerol	Lipids	-	--	1.12504	0.000139766	1.65781	0.729282	up
Lmhp011388	C21H36O4	2-α-Linolenoyl-glycerol	Lipids	55268-58-1	--	1.13369	0.000568785	1.63398	0.708388	up
pmb0296	C21H40O4	1-Oleoyl-Sn-Glycerol	Lipids	129784-87-8	--	1.12575	0.000143601	1.87633	0.907911	up
pmb0864	C19H40NO7P	LysoPE 14:0	Lipids	-	--	1.1166	0.000345214	1.9007	0.926529	up
Lmhp008440	C20H40NO7P	LysoPE 15:1	Lipids	-	--	1.12265	0.00291084	1.64233	0.715745	up
Lmhp008273	C20H40NO7P	LysoPE 15:1(2n isomer)	Lipids	-	--	1.12869	6.36333e-05	1.61293	0.689686	up
pmb0862	C20H42NO7P	LysoPC 12:0	Lipids	20559-18-6	--	1.01014	0.0165271	2.26107	1.177	up
Lmhp008885	C20H42NO7P	LysoPE 15:0(2n isomer)	Lipids	-	--	1.12762	0.000180279	1.70251	0.76766	up
Lmhp009187	C20H42NO7P	LysoPE 15:0	Lipids	-	--	1.133	0.00247136	2.38013	1.25104	up
pmb0876	C21H44NO7P	LysoPE 16:0	Lipids	53862-35-4	--	1.13262	0.000929322	1.54609	0.628621	up
pmd0130	C22H46NO7P	LysoPC 14:0	Lipids	20559-16-4	--	1.13025	5.89855e-05	1.77161	0.825062	up
pmb0856	C23H46NO7P	LysoPE 18:1(2n isomer)	Lipids	-	--	1.13153	4.71977e-05	2.01556	1.01118	up
mws0289	C23H46NO7P	LysoPE 18:1	Lipids	89576-29-4	--	1.12489	0.00158208	2.02987	1.02139	up
pmb2260	C23H46NO7P	LysoPC 15:1	Lipids	-	--	1.1281	0.00274023	2.28254	1.19064	up
pmb0880	C23H48NO7P	LysoPE 18:0(2n isomer)	Lipids	-	--	1.127	7.64712e-05	2.01607	1.01155	up
pmb2319	C23H48NO7P	LysoPC 15:0	Lipids	108273-89-8	--	1.13442	0.00170583	2.23567	1.16071	up
pmb0883	C23H48NO7P	LysoPE 18:0	Lipids	69747-55-3	--	1.10115	0.0167782	1.56896	0.64981	up
Lmhp009129	C23H48NO7P	LysoPC 15:0(2n isomer)	Lipids	-	--	1.10648	0.00316997	1.59106	0.669991	up
Lmhp007595	C24H42NO7P	LysoPC 16:4	Lipids	-	--	1.06769	0.00323078	1.91162	0.934799	up
pmb0855	C24H50NO7P	LysoPC 16:0	Lipids	17364-16-8	--	1.1334	9.13658e-06	1.58147	0.661268	up
Lmhp008688	C25H42NO7P	LysoPE 20:5	Lipids	-	--	1.11096	0.00042234	1.90156	0.927187	up
Lmhp009497	C25H44NO7P	LysoPE 20:4	Lipids	-	--	1.13408	8.0141e-05	2.69316	1.4293	up
Lmhp009349	C25H44NO7P	LysoPE 20:4(2n isomer)	Lipids	-	--	1.1356	0.000145828	2.76215	1.46579	up
Lmhp009802	C25H46NO7P	LysoPE 20:3(2n isomer)	Lipids	-	--	1.13284	3.13597e-05	3.52842	1.81902	up
Lmhp010040	C25H46NO7P	LysoPE 20:3	Lipids	-	--	1.13332	2.92103e-05	3.61217	1.85287	up
Lmhp008718	C25H48NO7P	LysoPC 17:2	Lipids	-	--	1.10523	0.00101508	1.85939	0.894827	up
Lmhp010757	C25H48NO7P	LysoPE 20:2	Lipids	-	--	1.13535	6.57406e-07	2.83321	1.50244	up
Lmhp010514	C25H48NO7P	LysoPE 20:2(2n isomer)	Lipids	-	--	1.13414	0.000207087	2.69266	1.42903	up
Lmhp009590	C25H50NO7P	LysoPC 17:1	Lipids	-	--	1.13603	0.0126202	50531.5	15.6249	up
Lmhp010515	C25H52NO7P	LysoPC 17:0(2n isomer)	Lipids	-	--	1.05107	0.0209416	1.63268	0.707245	up
pmb2406	C25H52NO7P	LysoPC 17:0	Lipids	50930-23-9	--	1.12693	0.00441054	1.84963	0.887238	up
Lmhp010334	C27H48O9	2-Linoleoylglycerol-1-O-glucoside	Lipids	-	--	1.12552	0.00289652	2.07074	1.05015	up
Lmhp010573	C27H48O9	1-Linoleoylglycerol-3-O-glucoside	Lipids	-	--	1.12325	0.000723585	2.28765	1.19386	up
pmp001251	C26H50NO7P	LysoPC 18:2(2n isomer)	Lipids	-	--	1.10339	0.00583252	1.54278	0.625531	up
pmp001273	C26H50NO7P	LysoPC 18:2	Lipids	-	--	1.04299	0.0170641	1.55064	0.632868	up
Lmqn008024	C24H44NO9P	PS(18:2)	Lipids	-	--	1.10794	0.0256377	2.13634	1.09514	up
pmp001281	C26H52NO7P	LysoPC 18:1	Lipids	-	--	1.10602	0.00488102	1.83217	0.87355	up
Lmhp010190	C26H52NO7P	LysoPC 18:1(2n isomer)	Lipids	-	--	1.11115	0.0010558	1.97313	0.980485	up
Lmhp008924	C27H50NO7P	LysoPC 19:3	Lipids	-	--	1.13624	0.00434328	12596.3	13.6207	up
Lmhp010908	C27H54NO7P	LysoPC 19:1	Lipids	-	--	1.08164	0.0023722	1.7239	0.78568	up
pmc0960	C28H50NO7P	LysoPC 20:4	Lipids	-	--	1.12379	0.00645597	2.3894	1.25665	up
Lmhp009890	C28H52NO7P	LysoPC 20:3	Lipids	1199257-41-4	--	1.13266	7.0348e-06	2.31487	1.21093	up
pmd0146	C28H54NO7P	LysoPC 20:2(2n isomer)	Lipids	-	--	1.12681	0.000868126	1.93838	0.954854	up
pmd0147	C28H54NO7P	LysoPC 20:2	Lipids	-	--	1.12467	0.000159885	1.92056	0.94153	up
pmd0142	C28H58NO7P	LysoPC 20:0(2n isomer)	Lipids	-	--	1.12107	0.000510098	1.55173	0.633878	up
pmd0148	C28H46NO9P	LysoPS 22:5 (2n isomer)	Lipids	-	--	1.01988	0.02502	1.55198	0.634111	up
Lmhp008744	C33H56O14	1-α-Linolenoyl-glycerol-2,3-di-O-glucoside	Lipids	-	--	1.07775	0.00302022	1.64985	0.722338	up
Lmhp009190	C33H58O14	2-Linoleoylglycerol-1,3-di-O-glucoside	Lipids	-	--	1.10771	0.0181163	2.09219	1.06502	up
Lmhp009384	C33H58O14	1-Linoleoylglycerol-2,3-di-O-glucoside	Lipids	-	--	1.11984	0.00208028	1.82752	0.869885	up
Zmjn003398	C12H20O4	2-Dodecenedioic acid	Lipids	6402-36-4	C16308	1.13576	0.0182887	9.85204e-05	-13.3092	down
mws0120	C8H20NO6P	Choline Alfoscerate	Lipids	28319-77-9	C00670	1.1261	0.00219074	0.580788	-0.783916	down
Lmhp009368	C30H50NO7P	LysoPC 22:6	Lipids	-	--	1.12807	5.24915e-05	0.519428	-0.945004	down
Lmhp009682	C30H52NO7P	LysoPC 22:5(2n isomer)	Lipids	-	--	1.1099	0.000665054	0.59167	-0.757135	down
pmb0374	C5H5N5	2-Aminopurine	Nucleotides and derivatives	452-06-2	--	1.13194	0.000200265	1.57094	0.651625	up
pmc0274	C6H6N4S	6-Methylmercaptopurine	Nucleotides and derivatives	50-66-8	C16614	1.11826	0.000551604	1.63758	0.711561	up
pme1266	C6H6N4O2	3-Methylxanthine	Nucleotides and derivatives	1076-22-8	C16357	1.08661	0.000312818	4.23272	2.08159	up
pme2060	C10H13N5	N6-Isopentenyladenine	Nucleotides and derivatives	2365-40-4	C04083	1.13543	0.00025307	5.48163	2.4546	up
pme3961	C10H13N5O3	2'-Deoxyadenosine	Nucleotides and derivatives	958-09-8	C00559	1.13346	2.16602e-05	1.84838	0.88626	up
pme0230	C10H13N5O4	Adenosine	Nucleotides and derivatives	58-61-7	C00212	1.13285	0.000405606	1.7517	0.808752	up
pme1474	C11H15N5O3S	5'-Deoxy-5'-(methylthio)adenosine	Nucleotides and derivatives	2457-80-9	C00170	1.13007	0.00142642	1.75514	0.811586	up
pme3174	C9H14N3O8P	Cytidine 5'-monophosphate(Cytidylic acid)	Nucleotides and derivatives	63-37-6	C00055	1.10325	0.00323101	2.41688	1.27314	up
pme3184	C10H14N5O6P	2'-Deoxyadenosine-5'-monophosphate	Nucleotides and derivatives	653-63-4	C00360	1.12761	0.00164266	2.33431	1.223	up
mws0675	C11H15N2O8P	β-Nicotinamide mononucleotide	Nucleotides and derivatives	1094-61-7	C00455	1.13394	4.32807e-06	4.488	2.16607	up
mws0874	C10H14N5O7P	3'-Adenylic acid	Nucleotides and derivatives	84-21-9	C01367	1.00039	0.0107429	2.64709	1.40441	up
Zmjn001030	C10H14N5O7P	Adenosine 2'-Phosphate	Nucleotides and derivatives	130-49-4	C00946	1.12395	0.00630708	1.80343	0.850747	up
pmb0981	C10H14N5O7P	Adenosine 5'-monophosphate	Nucleotides and derivatives	61-19-8	C00020	1.13407	0.00147433	5.13048	2.35909	up
pme3337	C14H17N5O8	Succinyladenosine	Nucleotides and derivatives	4542-23-8	--	1.11857	0.00010749	3.2175	1.68594	up
pmb0530	C21H27N7O14P2	Nicotinic acid adenine dinucleotide	Nucleotides and derivatives	53-84-9	C00003	1.10925	0.0168453	1.71556	0.778679	up
Lmqp000329	C8H14N3O7P	5-Aminoimidazole ribonucleotide	Nucleotides and derivatives	25635-88-5	--	1.10978	0.00626485	0.539906	-0.889219	down
mws0884	C10H12N5O6P	Cyclic 3',5'-Adenylic acid	Nucleotides and derivatives	60-92-4	C00575	1.1194	0.00025745	0.658983	-0.601686	down
pmc0066	C10H13N4O7P	2'-Deoxyinosine-5'-monophosphate	Nucleotides and derivatives	3393-18-8	C06196	1.13171	0.00121179	0.540917	-0.886522	down
mws0609	C10H12N5O7P	Guanosine 3',5'-cyclic monophosphate	Nucleotides and derivatives	7665-99-8	C00942	1.12542	0.000184015	0.619813	-0.690095	down
Lmqp000873	C4H4O3	Succinic anhydride	Organic acids	108-30-5	C19524	1.1228	0.000393842	1.54253	0.625301	up
pme3011	C4H9NO2	γ-Aminobutyric acid	Organic acids	56-12-2	C00334	1.1317	0.000222121	1.66154	0.732517	up
Lmbn000193	C3H4O4	Tartronate semialdehyde*	Organic acids	2480-77-5	C01146	1.13622	0.0024219	43285.6	15.4016	up
mws0576	C4H8O3	3-Hydroxybutyric acid	Organic acids	300-85-6	C01089	1.13319	0.000148186	1.50252	0.58738	up
pme1975	C3H4O4	Malonic acid	Organic acids	141-82-2	C00383	1.10243	0.003039	2.63861	1.39978	up
mws0376	C4H4O4	Fumaric acid	Organic acids	110-17-8	C00122	1.12811	8.12348e-05	3.41607	1.77234	up
mws0470	C4H6O4	Methylmalonic acid*	Organic acids	516-05-2	C02170	1.10506	0.0149855	1.50326	0.588095	up
mws0192	C4H6O4	Succinic acid*	Organic acids	110-15-6	C00042	1.1074	0.0175778	1.50898	0.593572	up
pme3096	C3H5NO4	Aminomalonic acid	Organic acids	1068-84-4	C00872	1.12069	0.000265436	1.56033	0.641848	up
mws0671	C4H9NO3	L-Homoserine*	Organic acids	672-15-1	C00263	1.12178	0.000369799	1.64304	0.716363	up
Zmgn000217	C5H6O4	Methylenesuccinic acid	Organic acids	97-65-4	C00490	1.11112	0.00157487	2.42277	1.27666	up
Lmrn002746	C6H12O3	2-Hydroxy-4-methylpentanoic acid	Organic acids	498-36-2	--	1.13374	0.000708826	2.09037	1.06376	up
Lmbn000198	C4H6O5	3-Dehydro-L-Threonic acid*	Organic acids	-	C03064	1.13398	0.00114412	2.82475	1.49812	up
mws0275	C4H6O5	L-Malic acid*	Organic acids	97-67-6	C00149	1.10815	0.000169067	3.99647	1.99872	up
Zmgn000503	C5H10O4	2,3-Dihydroxy-3-Methylbutanoic acid	Organic acids	1756-18-9	C04039	1.13481	0.00184617	3.90964	1.96704	up
mws0567	C5H11N3O2	4-Guanidinobutyric acid	Organic acids	463-00-3	C01035	1.13057	4.36032e-05	1.62049	0.696426	up
Zmyn000247	C5H8O5	2-Hydroxyglutaric acid*	Organic acids	13095-48-2	C03196	1.03404	0.0184802	3.87964	1.95592	up
Lmbn000216	C5H8O5	3-Methylmalic acid*	Organic acids	152204-30-3	C06032	1.05592	0.0212034	2.46056	1.29899	up
mws0639	C7H6O4	2,3-Dihydroxybenzoic acid*	Organic acids	303-38-8	C00196	1.13512	0.000217184	1.64734	0.720137	up
Lmbn001467	C7H13NO3	5-Acetamidopentanoic acid	Organic acids	1072-10-2	C03087	1.06719	0.0100513	1.7539	0.810563	up
pme2589	C6H8O5	2-Oxoadipic acid	Organic acids	3184-35-8	C00322	1.06192	0.00581262	1.59718	0.675528	up
mws0344	C5H10O6	D-Xylonic acid	Organic acids	526-91-0	C00502	1.12347	0.0001553	2.16246	1.11268	up
Lmrn003000	C9H10O3	2-Hydroxy-3-phenylpropanoic acid	Organic acids	7326-19-4	C05607	1.10651	0.0119077	2.75396	1.46151	up
ML10176345	C7H8O5	3-Dehydroshikimic acid	Organic acids	2922-42-1	C02637	1.13585	0.0111623	7187.63	12.8113	up
mws0242	C8H14O4	Suberic acid	Organic acids	505-48-6	C08278	1.12919	0.000605295	2.97555	1.57316	up
Lmgn002555	C8H14O4	2-Propylglutaric acid	Organic acids	32806-62-5	C16658	1.12787	8.20983e-05	1.55052	0.632757	up
Zmgn001448	C7H12O5	2-Propylmalic acid*	Organic acids	-	C05994	1.01128	0.00685637	2.493	1.31788	up
Lmbn001754	C7H12O5	3-Isopropylmalic acid*	Organic acids	921-28-8	C04411	1.12374	0.016971	3.51645	1.81412	up
pmb3101	C7H12O5	2-Isopropylmalic acid	Organic acids	49601-06-1	C02504	1.11444	0.000224406	2.80358	1.48727	up
Lmgn000242	C6H10O6	4,5,6-Trihydroxy-2-oxohexanoic acid	Organic acids	56742-44-0	C01216	1.13589	0.0211457	26390	14.6877	up
Zmyn000453	C6H8O7	Isocitric acid	Organic acids	320-77-4	C00311	1.13062	0.00137429	12.3333	3.62448	up
mws0277	C7H12O6	Quinic acid	Organic acids	77-95-2	C00296	1.13619	0.00304063	110764	16.7571	up
Zmln000282	C6H8O8	Hibiscus acid	Organic acids	6205-14-7	--	1.12007	0.00082852	4.36625	2.12639	up
Lmmn003323	C16H32O3	2-Hydroxyhexadecanoic acid	Organic acids	764-67-0	--	1.12166	0.00109737	1.86795	0.901458	up
Hmcp004650	C16H30O4	Hexadecanedioic acid	Organic acids	505-54-4	C19615	1.13147	0.00618913	7.3053	2.86894	up
pme3034	C5H8O4	Ethylmalonic acid	Organic acids	601-75-2	--	1.13603	0.00716856	5.79499e-05	-14.0748	down
Lmbn002862	C7H6O3	3-Hydroxybenzoic acid	Organic acids	99-06-9	C00587	1.13167	0.000181031	0.541038	-0.886199	down
Wmzn000227	C6H10O4	2,2-Dimethylsuccinic acid	Organic acids	597-43-3	--	1.07434	0.00220274	0.493272	-1.01955	down
Lmbn003524	C9H16O3	9-Oxononanoic acid	Organic acids	2553-17-5	C16322	1.11683	0.00984539	0.649005	-0.623698	down
Zmyn000268	C3H6O3	2,3-Dihydroxypropanal	Others	56-82-6	C02154	1.13432	0.0463221	4548.11	12.1511	up
mws0889	C4H8O5	D-Threonic acid	Others	3909-12-4	C21649	1.12105	0.000385263	2.00515	1.00371	up
Zmjp000624	C8H9NO3	Pyridoxal	Others	66-72-8	C00250	1.12368	0.000884838	1.70665	0.771169	up
pme1383	C8H11NO3	Pyridoxine	Others	65-23-6	C00314	1.13434	0.000959876	2.01149	1.00826	up
mws4175	C6H8O6	D-Glucurono-6,3-lactone	Others	32449-92-6	C02670	1.09009	0.0387202	2.19103	1.13161	up
pme2596	C8H9NO4	4-Pyridoxic acid	Others	82-82-6	C00847	1.13133	1.2895e-05	2.21059	1.14443	up
pme0534	C6H12O7	Gluconic acid	Others	526-95-4	C00257	1.12493	0.000135073	1.87205	0.904617	up
Zmyn000108	C6H10O8	D-Saccharic acid*	Others	87-73-0	C00818	1.128	0.0033068	2.45244	1.29422	up
Zmpn000199	C6H10O8	D-Galactaric acid*	Others	526-99-8	C00879	1.11899	0.000119599	2.70199	1.43402	up
mws1337	C9H17NO5	D-Pantothenic acid	Others	79-83-4	C00864	1.13566	1.4638e-06	2.33126	1.22111	up
Hmyp002656	C11H11NO4	Methyl dioxindole-3-acetate	Others	57061-18-4	--	1.12571	6.65126e-05	2.48881	1.31545	up
mws2608	C8H15NO6	N-Acetyl-D-galactosamine*	Others	1811-31-0	C01132	1.13219	0.00252951	2.21409	1.14672	up
pme2266	C10H16N2O3S	Biotin	Others	58-85-5	C00120	1.13014	0.000125523	2.22055	1.15092	up
pmn001602	C18H16O2	2-Methoxyl-7-hydroxy-1-methyl-5-vinyl phenanthrene	Others	-	--	1.11146	0.00142807	2.5752	1.36469	up
pmp001267	C21H37NO	2-(Dodecylamino)-3-phenyl-1-propanol	Others	-	--	1.10526	0.00100458	1.91744	0.93918	up
pmb0789	C14H21NO8	Pyridoxine-5'-O-glucoside	Others	-	C03996	1.13265	0.00203143	4.70864	2.23531	up
pme3311	C6H14O12P2	D-Fructose-1,6-biphosphate	Others	488-69-7	C00354	1.12835	0.00045259	4.64781	2.21655	up
pmb0801	C14H19NO9	4-Pyridoxic acid-O-glucoside	Others	-	--	1.13597	9.76465e-06	3.48825	1.8025	up
pmb0790	C20H31NO13	Pyridoxine-5'-O-diglucoside	Others	-	--	1.1286	0.00753865	5.70695	2.51272	up
pme0500	C18H32O16	D-Melezitose*	Others	597-12-6	C08243	1.0369	0.0287598	2.41564	1.2724	up
mws1589	C18H32O16	D-Panose*	Others	33401-87-5	C00713	1.00103	0.0248558	2.09507	1.067	up
Hmcn000773	C21H32O14	6'-O-Glucosylaucubin	Others	-	--	1.08859	0.011027	2.23595	1.16089	up
Zmhn001414	C26H32O13	Resveratrol-3,5-di-O-glucoside	Others	-	--	1.13303	0.00109247	2.97231	1.57158	up
mws0021	C14H12O3	Resveratrol	Others	501-36-0	C03582	1.12568	0.00399199	0.518267	-0.948233	down
pmn001399	C20H22O9	2,4,6,4'-Tetrahydroxy-stilbene-2-O-glucoside*	Others	-	--	1.13624	0.00399546	6.93268e-06	-17.1382	down
Zmhn001746	C20H22O9	Piceatannol-3'-O-glucoside*	Others	94356-26-0	--	1.13623	0.0027381	7.32064e-06	-17.0596	down
Lmgn001670	C7H6O3	Salicylic acid	Phenolic acids	69-72-7	C00805	1.11114	0.000582307	1.53973	0.622676	up
mws0180	C7H6O4	2,5-Dihydroxybenzoic acid; Gentisic acid*	Phenolic acids	490-79-9	C00628	1.1272	0.00144707	1.67827	0.746976	up
mws0183	C7H6O4	3,4-Dihydroxybenzoic acid (Protocatechuic acid)*	Phenolic acids	99-50-3	C00230	1.11965	0.00218415	1.58444	0.663972	up
mws0885	C7H6O4	2,4-Dihydroxybenzoic acid	Phenolic acids	89-86-1	--	1.11731	0.000462775	1.65181	0.724049	up
pme1439	C9H8O3	p-Coumaric acid	Phenolic acids	501-98-4	C00811	1.13255	1.53451e-05	1.54728	0.629734	up
pmb0142	C9H8O3	Caffeic aldehyde	Phenolic acids	141632-15-7	C10945	1.13173	0.00124872	2.32538	1.21747	up
Lmbn005172	C9H10O3	2,6-Dimethoxybenzaldehyde	Phenolic acids	3392-97-0	--	1.087	0.029835	3.21919	1.6867	up
NK10253223	C8H9NO3	2-Amino-3-methoxybenzoic acid	Phenolic acids	3177-80-8	C05831	1.12493	0.000668126	1.66594	0.736335	up
pmb2795	C10H10O3	4-Methoxycinnamic acid*	Phenolic acids	830-09-1	--	1.13331	0.00195787	2.18947	1.13058	up
mws1195	C10H10O3	p-Coumaric acid methyl ester*	Phenolic acids	3943-97-3	--	1.13403	0.000266192	3.59901	1.8476	up
mws0009	C10H10O3	Coniferaldehyde	Phenolic acids	20649-42-7	C02666	1.12784	0.000526384	3.30593	1.72506	up
mws2212	C9H8O4	Caffeic acid	Phenolic acids	331-39-5	C01197	1.08136	0.0123637	1.71818	0.780881	up
mws0093	C10H12O3	Coniferyl alcohol	Phenolic acids	458-35-5	C00590	1.12192	0.00223349	2.61602	1.38738	up
Lmbn004847	C10H12O3	4-Methoxyphenylpropionic acid	Phenolic acids	-	--	1.07767	0.0083517	2.22022	1.1507	up
Hmtn001288	C9H10O4	Methyl 2,4-dihydroxyphenylacetate	Phenolic acids	67828-42-6	--	1.11985	7.82854e-05	4.24358	2.08528	up
HJAP052	C10H12O4	2,4,5-Trimethoxybenzaldehyde	Phenolic acids	4460-86-0	--	1.01605	0.014831	1.55333	0.635369	up
MA10107783	C10H8O5	3-[(1-Carboxyvinyl)oxy]benzoic acid	Phenolic acids	16929-37-6	C20772	1.0851	0.011787	1.76323	0.818218	up
mws0853	C11H14O4	Sinapyl alcohol*	Phenolic acids	537-33-7	C02325	1.08951	0.00354117	1.5205	0.60455	up
HJAP044	C12H16O4	1-(2,4,5-Trimethoxyphenyl)propan-1-one	Phenolic acids	3904-18-5	--	1.13605	0.00850441	5064.56	12.3062	up
pme3472	C12H16O7	Arbutin	Phenolic acids	497-76-7	C06186	1.13049	0.00241976	1.76915	0.823057	up
Lmhn002926	C13H12O7	p-Coumaroylmalic acid	Phenolic acids	-	--	1.10635	0.00566244	1.66169	0.732648	up
pmn001511	C13H18O7	3-Hydroxy-5-Methylphenol-1-O-Glucoside	Phenolic acids	-	--	1.09605	0.00115555	2.82296	1.49721	up
Zmhn000892	C13H18O8	4-O-Glucosyl-3,4-dihydroxybenzyl alcohol	Phenolic acids	-	--	1.13617	0.00443461	376407	18.5219	up
Lmhn003074	C14H14O8	Feruloylmalic acid	Phenolic acids	-	--	1.09267	0.000951715	3.11896	1.64106	up
Cmzp002057	C14H18O8	6-O-Acetylarbutin	Phenolic acids	10338-88-2	--	1.13607	0.0101088	10717.4	13.3877	up
pmn001367	C13H16O9	Protocatechuic acid-4-O-glucoside	Phenolic acids	-	--	1.13576	6.00364e-05	3.96676	1.98796	up
Hmtn001120	C14H20O8	5-(2-Hydroxyethyl)-2-O-glucosylphenol	Phenolic acids	-	--	1.13025	0.00137922	2.11712	1.0821	up
Zmdn001863	C18H14O6	2-(7-Dihydroxyl)-benzofuranyl-ferulic acid	Phenolic acids	-	--	1.13623	0.00278298	15060.4	13.8785	up
Lmtn002565	C14H18O9	1-O-Vanilloyl-D-Glucose	Phenolic acids	-	C20470	1.13322	3.04179e-05	1.67597	0.744999	up
pmn001517	C15H22O8	3,4,5-Trimethoxyphenyl-1-O-Glucoside	Phenolic acids	-	--	1.13042	0.000730374	1.65338	0.725415	up
pmn001518	C13H16O10	1-O-Galloyl-D-glucose	Phenolic acids	58511-73-2	C01158	1.1322	1.5554e-05	1.99541	0.996686	up
Lmfn000604	C13H16O10	6-O-Galloyl-glucose	Phenolic acids	13186-19-1	--	1.13622	0.00341397	81658.9	16.3173	up
Hmln000873	C13H16O10	2-O-Galloyl-glucose	Phenolic acids	-	--	1.12996	0.00016105	1.87025	0.903231	up
pmb3068	C16H18O8	1-O-p-Coumaroylquinic acid	Phenolic acids	-	--	1.10307	0.00435643	1.58702	0.666322	up
pma6460	C16H18O8	4-O-p-Coumaroylquinic acid	Phenolic acids	32451-86-8	C10441	1.13002	9.74518e-05	1.56326	0.644559	up
pma0149	C15H16O9	Sinapoyl malate	Phenolic acids	92344-58-6	C02887	1.13602	0.000107172	2.87949	1.52581	up
Zmln000899	C15H20O9	Syringaldehyde-4-O-glucoside	Phenolic acids	-	--	1.12579	7.00296e-05	2.55536	1.35353	up
Lmmn000774	C15H20O9	Dihydrocaffeoylglucose	Phenolic acids	-	--	1.13315	3.1716e-06	2.76182	1.46562	up
Lmtn000940	C14H18O10	1-O-(3,4-Dihydroxy-5-methoxy-benzoyl)-glucoside	Phenolic acids	-	--	1.13501	0.000633859	3.80101	1.92638	up
mws0748	C16H18O9	1-Caffeoylquinic acid	Phenolic acids	1241-87-8	--	1.10559	0.00420116	1.55945	0.641041	up
mws2108	C16H18O9	Cryptochlorogenic acid	Phenolic acids	905-99-7	--	1.10014	0.00153027	1.66946	0.739378	up
pme1816	C16H18O9	Neochlorogenic acid(5-O-Caffeoylquinic acid)	Phenolic acids	906-33-2	C17147	1.115	0.00176295	1.63132	0.706043	up
pmb3056	C16H20O9	Homovanilloylquinic acid	Phenolic acids	-	--	1.11858	0.000171797	3.27164	1.71001	up
pmb0108	C19H18O8	Feruloyl syringic acid	Phenolic acids	-	--	1.09237	0.0127764	1.89135	0.919416	up
Zmhn002227	C17H22O10	4-O-Glucosyl-sinapate	Phenolic acids	-	C02919	1.11911	0.00431495	1.55646	0.63827	up
Cmjn004337	C18H26O10	Benzyl-(2''-O-xylosyl)glucoside	Phenolic acids	-	--	1.05901	0.0247058	2.00428	1.00309	up
Lmtn002324	C19H28O11	Benzyl-(2''-O-glucosyl)glucoside	Phenolic acids	-	C17564	1.12022	0.0118921	2.56453	1.35869	up
Cmzn005251	C21H22O10	6-O-Caffeoylarbutin	Phenolic acids	136172-60-6	--	1.13342	1.09481e-05	3.14524	1.65317	up
pmb2654	C19H27NO12	Anthranilate-1-O-Sophoroside	Phenolic acids	-	--	1.12529	0.00806892	2.71492	1.44091	up
Lmhn002321	C21H18O12	Vnilloylcaffeoyltartaric acid	Phenolic acids	-	--	1.12639	0.000268638	2.3894	1.25665	up
pmb2554	C23H30O14	5-O-Feruloyl quinic acid glucoside*	Phenolic acids	-	--	1.13056	0.000181193	2.06326	1.04493	up
pmb2833	C23H30O14	3-O-Feruloylquinic acid glucoside*	Phenolic acids	-	--	1.1291	4.89603e-05	2.31893	1.21346	up
pmn001671	C23H32O15	Furanofructosyl-α-D-(6-mustard acyl)glucoside	Phenolic acids	-	--	1.13628	0.000603398	43423.3	15.4062	up
mws0628	C7H6O2	4-Hydroxybenzaldehyde	Phenolic acids	123-08-0	C00633	1.13573	1.43232e-06	0.508685	-0.975155	down
mws0749	C7H6O3	4-Hydroxybenzoic acid	Phenolic acids	99-96-7	C00156	1.1265	0.000622393	0.558263	-0.840983	down
Hmgn001653	C7H6O3	Protocatechuic aldehyde*	Phenolic acids	139-85-5	C16700	1.13416	8.74787e-05	0.621523	-0.68612	down
Zmzn002575	C6H5NO3	2-Nitrophenol	Phenolic acids	88-75-5	C01988	1.13308	0.000415662	0.22521	-2.15065	down
mws1024	C9H8O2	p-Coumaraldehyde	Phenolic acids	2538-87-6	C05608	1.12313	0.000222817	0.611463	-0.709664	down
MA10040889	C6H5NO4	4-Nitrocatechol	Phenolic acids	3316-09-4	C02235	1.08057	0.0013307	0.388929	-1.36242	down
NK10252689	C7H7NO4	2-Methoxy-5-nitrophenol	Phenolic acids	636-93-1	C17385	1.13332	0.00100901	0.113129	-3.14396	down
pmp001234	C12H12O2	Butylidenephthalide	Phenolic acids	72917-31-8	C16924	1.12374	0.00837608	0.468586	-1.09361	down
mws1509	C13H10O3	Phenyl salicylate	Phenolic acids	118-55-8	C14163	1.11531	0.000306001	0.427224	-1.22694	down
Hmln002806	C16H16O8	5-O-Caffeoylshikimic acid	Phenolic acids	180981-12-8	C10434	1.07258	0.00944068	0.580018	-0.785831	down
mws0178	C16H18O9	Chlorogenic acid	Phenolic acids	327-97-9	C00852	1.11415	0.00085358	0.557208	-0.843713	down
mws0179	C17H20O9	Chlorogenic acid methyl ester	Phenolic acids	29708-87-0	--	1.10233	0.0203436	0.603801	-0.727855	down
Lmhn002574	C20H16O11	Caffeoyl(p-Hydroxybenzoyl)tartaric acid	Phenolic acids	-	--	1.12704	6.80622e-06	0.191966	-2.38108	down
Lmgp003989	C25H22O11	Dicaffeoylshikimic acid	Phenolic acids	-	--	1.13438	0.00275209	0.0906556	-3.46346	down
Zmsp001834	C8H8O4	2,6-Dimethoxy-1,4-benzoquinone	Quinones	530-55-2	C10331	1.13471	2.54579e-06	1.73881	0.798098	up
mws1659	C15H10O5	Emodin	Quinones	518-82-1	C10343	1.11469	0.0233819	2.63075	1.39548	up
Zmhn002980	C15H10O9S	Hydroxyaloe-emodin-8-O-sulfate	Quinones	-	--	1.13618	3.88914e-05	6.33395	2.66311	up
Lmdp002381	C11H14O5	Genipin	Terpenoids	6902-77-8	C09780	1.13248	9.11387e-06	2.24714	1.16809	up
mws1574	C16H22O10	Geniposidic acid	Terpenoids	27741-01-1	C11673	1.13557	0.0303916	21479.3	14.3907	up
HJN110	C30H48O3	Betulinic acid*	Terpenoids	472-15-1	C08619	1.04086	0.0146406	1.89396	0.921408	up
mws4053	C30H48O3	Ursolic acid	Terpenoids	77-52-1	C08988	1.03836	0.0302489	1.70549	0.770187	up
Lmdn006811	C30H48O3	Soyasapogenol E*	Terpenoids	6750-59-0	C17420	1.07952	0.0105348	1.86101	0.896083	up
Hmjn008136	C30H46O4	Camaldulenic acid	Terpenoids	71850-15-2	--	1.09838	0.00274007	1.60945	0.68657	up
pmn001708	C30H48O5	Asiatic acid	Terpenoids	464-92-6	C08617	1.13626	0.000454762	11517	13.4915	up
Lmmp006307	C48H76O20	Bayogenin-3-O-glucuronide-28-O-(2''-O-Rhamnosyl)glucoside	Terpenoids	-	--	1.13582	0.00979555	1868.56	10.8677	up
